# Supplementary material for: Persistent inflammation during anti-tuberculosis treatment with diabetes comorbidity
Source: eLife. 2019 Jul 4;8:e46477. doi: 10.7554/eLife.46477 (PMC6660216; doi:10.7554/eLife.46477)
Supplement: Source data 1. [file elife-46477-data1.xlsx]

## Sheet: Instructions
Inidia Cohort
Diabetes Status	DM = Diabetes or NDM = Non Diabetes
ID	Unique ID
Timepoints	Each Sheet represents a different timepoint in month
	preART
	2
	6
	18
preATT Laboratorial Parameters	in another sheet
HbA1C	additional information in another sheet
Sex	Male or Female
age	Age in Years
BMI	Body mass index
smokestatus	Current Smoker, Former Smoker, Never Smoked
currentdrinker	Yes or No
A1c_pct	Percent of A1c
Luminex data	pg/mL

## Sheet: India Meta Data
subjid	male	age	BMI	smokestatus	currentdrinker	A1c_pct
100003	Male	38	19.7777	Current Smoker	yes	10
100013	Male	34	23.5304	Former Smoker	no	11
100017	Male	53	15.7558	Current Smoker	yes	8.3
100018	Male	30	16.6493	Current Smoker	yes	5.6
100019	Female	41	15.8059	Never Smoker	no	5.4
100020	Male	45	18.2899	Never Smoker	yes	5
100022	Male	37	20.3244	Never Smoker	no	6
100024	Male	48	21.048	Never Smoker	no	9.3
100034	Male	28	15.427	Never Smoker	yes	5.4
100035	Male	48	18.9349	Never Smoker	yes	8.5
100038	Male	31	19.3625	Former Smoker	no	5.4
100039	Male	45	16.3847	Former Smoker	yes	6.7
100046	Male	60	19.1516	Current Smoker	no	11.8
100049	Female	60	15.4321	Never Smoker	no	6
100061	Female	30	20.2694	Never Smoker	no	5.1
100064	Male	50	22.0386	Former Smoker	no	6.8
100077	Male	41	18.662	Current Smoker	no	5.7
100078	Male	32	19.8347	Never Smoker	no	6.2
100079	Male	35	13.818	Never Smoker	no	5.7
100096	Male	41	16.2278	Former Smoker	yes	11.3
100098	Male	35	13.5129	Never Smoker	no	7.7
100114	Male	31	16.494	Never Smoker	yes	11.2
100119	Male	49	18.75	Never Smoker	no	5.3
100125	Female	62	23.6304	Never Smoker	no	6.2
100130	Male	67	16.0229	Never Smoker	yes	5
100135	Male	55	22.9854	Never Smoker	no	5.4
100144	Male	53	23.0112	Never Smoker	yes	7.9
100145	Male	46	21.7555	Never Smoker	no	5.6
100149	Female	31	17.3484	Never Smoker	no	6.8
100157	Male	45	18.4911	Current Smoker	no	6.2
100159	Female	50	29.4758	Never Smoker	no	9.1
100162	Male	47	14.3673	Former Smoker	no	6.6
100200	Male	28	13.4272	Never Smoker	yes	5.9
100212	Male	42	15.7313	Current Smoker	yes	5.6
100219	Male	45	15.2249	Current Smoker	yes	5
100231	Male	38	14.1285	Never Smoker	yes	5.7
100237	Male	48	15.6735	Current Smoker	yes	5.8
100242	Female	29	29.4453	Never Smoker	no	13.1
100243	Male	30	17.301	Current Smoker	yes	5.5
100021	Male	38	19.0039	Never Smoker	no	10.2
100048	Male	36	18.424	Former Smoker	no	5.8
100088	Male	52	20.83	Never Smoker	yes	9.8
100099	Male	36	15.9439	Former Smoker	no	8.3
100120	Male	48	20.0288	Former Smoker	no	7.3
100123	Female	52	22.9592	Never Smoker	no	11.9
100175	Male	52	13.5905	Former Smoker	no	6.5
100188	Male	48	16.3593	Current Smoker	yes	6.1
100210	Male	28	14.6788	Current Smoker	yes	10.2
100023	Female	30	19.5556	Never Smoker	no	11.2
100037	Female	48	18.9036	Never Smoker	no	12.9
100082	Male	55	16.2274	Former Smoker	yes	14.7
200054	Female	25	16.8802	Never Smoker	no
200071	Male	45	17.7778	Current Smoker	yes	12.2
300055	Male	57	16.8962	Current Smoker	yes	12.8
300067	Male	54	21.6206	Former Smoker	no	13.6
300075	Male	27	17.1314	Former Smoker	no	5.8
300111	Male	26	14.5159	Never Smoker	yes	6.1
300112	Male	54	20.5191	Current Smoker	no	12.2
300161	Male	52	21.7784	Never Smoker	no	6.1
300246	Male	26	15.0356	Never Smoker	no	5.5
100070	Male	38	15.0555	Never Smoker	no	5.1
100074	Male	48	12.8185	Former Smoker	no	5.3
100085	Male	43	16.3593	Never Smoker	no	5.9
100121	Male	38	26.2985	Former Smoker	no	5.8
100124	Female	49	23.2834	Never Smoker	no	5.2
100132	Male	43	20.2848	Former Smoker	no
100169	Female	27	17.7458	Never Smoker	no	6.1
100171	Male	25	14.7929	Never Smoker	yes	6.2
200066	Male	34	21.3599	Current Smoker	yes	6.4
200154	Male	48	15.0597	Never Smoker	yes	6.8
100065	Female	37	15.5556	Never Smoker	no	5.7
100068	Male	52	20.9572	Never Smoker	no	5.3
100084	Male	45	14.8729	Former Smoker	no	6.7
100113	Male	39	15.3787	Never Smoker	yes	10
100127	Male	52	18.2563	Never Smoker	yes	5.8
100137	Female	45	25.204	Never Smoker	no	14.6
100139	Female	30	14.9116	Never Smoker	no	5.6
100140						11.8
100186	Male	55	15.0356	Former Smoker	no	9.6
100090	Male	58	20.0288	Former Smoker	no	13.9
100118	Female	45	24.7737	Never Smoker	no	5.2
100126	Male	44	26.6728	Never Smoker	no	11.4
100129	Male	25	16.7062	Former Smoker	yes	5.4
100147	Female	50	22.6409	Never Smoker	no	6.1
200076	Male	42	16.2982	Current Smoker	yes	5.7
200122	Male	40	17.6471	Former Smoker	no	7.3
200146	Male	40	25.0399	Former Smoker	no	5.5
200150	Male	40	24.6094	Never Smoker	yes	6.8

## Sheet: preART
Diabetes Status	ID	IFNg	TNFa	IL-2	IL-17A	IL-17F	IL-6	IL-7	IL-8	IL-12	IL-1b	GM-CSF	G-CSF	IL-4	IL-5	IL-10	IL-13	IL-19	IL-27	IL-37	TGFb
DM	ED 01100064	2270.96	2724.68	64.2632	670	1216.12	653.782	157.581	451.016	96.6089	326.439	191	322.222	3.30479	15.9437	12	117.836	115.1	450.286	5.68107	63.263
DM	ED 05100065	679.548	990.469	97.4936	200	247.537	344.862	48.7075	694.264	86.662	183.65	92	185.931	4.07345	9.0313	12	90.5786	116.4	586.768	245.395	9.659
DM	ED 04200066	2069.05	1333.14	117.537	340	1421.86	543.651	91.1361	675.056	91.0494	198.618	79	192.096	3.77226	11.7735	14	95.1162	115.1	438.161	479.16	34.808
DM	ED 03300067	1389.86	1033.19	135.075	310	1441.08	282.582	52.6819	624.241	90.5446	191.126	64	210.609	3.81088	10.8072	8	104.198	112.6	470.673	139.871	78.422
DM	ED 05100068	1280.85	1118.72	114.526	290	1284.65	373.8	64.6092	857.586	91.5584	187.386	64	173.61	3.83036	10.6791	10.5	104.198	116.4	527.259	59.7088	110.85
DM	ED 06200076	1933.51	1161.54	143.281	310	1232.23	277.811	55.3319	765.409	88.8119	179.917	67	155.15	3.94977	11.1281	10	72.45	77.07	565.343	737.307	50.205
DM	ED 01100079	953.226	692.37	116.931	260	1318.32	279.398	56.657	57.9798	88.0855	166.886	60	152.075	3.90949	10.1688	16	67.9232	116.4	458.275	32.7582	102.468
DM	ED 06100118	624.741	522.761	50.6353	350	622.31	262.133	16.9365	1436.54	85.2776	202.37	122	155.15	4.05254	8.28139	23	52.0964	58.72	438.161	323.749	97.586
DM	ED 01100119	624.741	2790.72	61.4853	360	299.51	270.713	43.4093	1101.47	85.2776	2088.41	48	235.332	3.84997	8.53061	12	58.876	115.1	460.711	504.964	42.121
DM	ED 04100121	405.269	522.761	74.8624	115	442.45	319.366	27.522	84.1617	84.8248	165.028	44	130.577	4.09448	8.6555	19	54.3558	111.3	436.94	139.871	45.546
DM	ED 04100124	789.091	734.856	89.843	250	1675.76	153.283	64.6092	752.39	86.662	243.9	86	185.931	3.97009	9.91469	14.5	63.3986	119	468.163	5.68107	61.309
DM	ED 01100125	1607.61	862.513	90.6495	410	512.254	323.562	104.411	414.827	89.0562	243.9	98	185.931	3.8206	10.0416	25	90.5786	116.4	450.286	86.54	100.298
DM	ED 06100126	1335.37	565.113	96.3837	310	965.87	361.41	57.9822	611.629	86.662	174.327	58	176.689	3.85982	9.97814	21	67.9232	119	458.275	32.7582	91.289
DM	ED 05100127	734.332	565.113	98.0506	200	1603.67	690.062	43.4093	649.575	87.6067	161.316	46	176.689	3.99052	9.40878	11	67.9232	115.1	592.183	139.871	82.802
DM	ED 04100132	460.173	565.113	100.857	200	1247.26	226.675	40.7606	951.601	87.6067	140.968	44	136.715	4.07345	9.0313	12	86.0433	107.7	441.167	5.68107	91.523
DM	ED 01100135	1933.51	1118.72	96.9379	330	1486.21	242.277	93.7904	662.297	90.0442	209.886	102	192.096	3.83036	10.9354	12	86.0433	119	509.415	139.871	73.796
DM	ED 05100137	1553.21	990.469	84.546	360	1378.68	145.695	73.8903	605.337	91.0494	206.126	82	204.435	3.84997	10.1688	13	99.6559	89.71	458.275	113.258	47.292
DM	ED 05100139	1417.1	862.513	49.5723	340	581.144	369.356	144.278	549.123	91.0494	198.618	137	173.61	3.79151	10.0416	23	90.5786	105.3	527.094	59.7088	60.952
DM	ED 05100140	953.226	926.453	105.421	410	891.62	167.533	69.9122	649.575	88.5687	179.917	68	198.264	3.88953	12.6193	14	163.436	117.7	568.458	166.384	107.62
DM	ED 01100144	1255.45	1937.86	104.272	570	1879.23	147.58	109.722	390.883	94.1684	242.002	120	222.965	3.53269	14.2009	19	108.742	117.7	568.458	5.68107	76.445
DM	ED 01100145	569.909	649.918	139.97	200	1987.76	594.426	39.4364	584.681	84.8248	320.622	42	136.715	3.97009	8.40591	134	54.3558	119	509.415	59.7088	31.976
DM	ED 06100147	569.909	438.157	140.63	180	1544.3	667.291	72.5642	1263.35	84.3765	161.316	59	130.577	3.94977	8.6555	32	49.8376	105.3	436.94	479.16	36.825
DM	ED 06200150	1226.3	947.784	110.665	280	1691.38	170.171	104.411	752.39	88.0855	172.465	64	149.002	3.90949	9.59815	22	72.45	119	546.768	48.8808	101.449
DM	ED 01100159	515.053	438.157	47.6793	310	1543.81	174.155	56.657	1790.54	87.6067	185.517	36	176.689	3.55042	8.6555	12	63.3986	107.7	717.026	711.416	24.827
DM	ED 01100046	1007.89	947.784	51.277	400	1337.57	518.971	51.357	1074.81	89.0562	490.788	124	284.916	3.84997	8.78058	11	70.1863	66.87	960.95	86.54	20.681
DM	ED 01100049	185.411	395.906	84.024	110	660.63	578.357	15.6137	457.08	84.3765	135.44	20	130.577	4.11563	8.40591	10	49.8376	108.9	493.714	59.7088	69.116
DM	ED 03200054	1335.37	607.499	24.7236	250	921.068	258.269	22.2286	1841.93	86.1962	472.65	45	235.332	3.93966	8.59303	12	63.3986	110.1	510.638	219.14	14.828
DM	ED 04100074	1897.8	2155.38	113.034	510	855.054	669.554	88.4821	355.237	107.548	259.12	114	241.52	3.46296	14.8676	11	106.469	105.3	436.94	192.805	93.987
DM	ED 03300111	405.269	269.353	57.4079	470	1844.89	620.516	54.0068	1452.57	84.8248	191.126	148	112.178	4.03175	8.28139	11	54.3558	92.87	586.768	192.805	49.996
DM	ED 06200146	295.388	395.906	49.5723	265	1730.96	271.498	20.9055	619.033	83.9324	183.65	56	87.6871	4.03175	8.40591	22	54.3558	106.5	441.167	479.16	85.741
DM	ED 04200154	761.715	798.647	148.656	170	918.692	290.604	36.7882	897.652	91.0494	159.461	42	136.715	3.98029	10.0416	11	83.7763	113.8	779.593	349.75	37.441
DM	ED 03300161	679.548	798.647	150.696	200	559.841	570.921	30.1691	785.007	87.6067	142.813	43	136.715	3.97009	9.15694	10	95.1162	90.76	921.897	841.279	43.358
DM	ED 01100003	1007.89	692.37	141.952	310	470.197	438.248	27.522	751.213	93.1115	146.506	48	112.178	3.90949	8.78058	13	67.9232	93.95	510.638	59.7088	78.374
DM	ED 01100013	405.269	522.761	65.6702	505	516.334	340.559	32.8165	1832.18	87.6067	247.7	182	130.577	4.01107	8.28139	11	58.876	75.27	479.969	5.68107	23.75
DM	ED 01100017	240.411	353.688	127.732	240	1019.9	332.017	18.2594	1251.53	85.7348	135.44	28	99.9265	4.12625	8.28139	11	54.3558	75.1	438.161	32.7582	12.751
DM	ED 02100021	487.616	438.157	76.8599	170	1065.54	244.538	15.6137	1124.46	91.0494	131.759	26	93.8053	4.11563	8.28139	11.5	63.3986	97.23	568.458	48.8808	39.787
DM	ED 01100022	843.827	438.157	57.1845	160	652.399	281.785	30.1691	1846.81	125.352	402.844	50	139.786	4.01107	8.28139	4	49.8376	100.6	468.163	32.7582	16.575
DM	ED 01100024	185.411	417.027	108.904	140	2234.24	165.564	19.5824	221.809	84.3765	120.741	48	112.178	4.09448	8.40591	10.5	58.876	98.35	617.964	113.258	22.424
DM	ED 01100035	4563.36	3879.32	46.639	260	1996.8	1081.35	16.9365	1400.51	88.0855	375.248	96	450.441	3.86969	8.6555	11	63.3986	110.1	509.415	76.3798	81.965
DM	ED 03100037	185.411	353.688	71.1756	120	975.336	1444.11	27.522	284.919	84.3765	336.152	42	161.3	4.11563	8.28139	18	49.8376	85.64	884.218	113.258	93.407
DM	ED 01100038	679.548	565.113	5.96343	315	1372.02	399.081	35.4642	619.033	87.1322	224.964	126	173.61	3.88953	9.0313	19	74.7142	110.1	460.711	219.14	103.188
DM	ED 05100084	1335.37	947.784	123.358	230	496.569	1013.22	54.0068	499.777	87.6067	183.65	56	136.715	3.92957	10.0416	13	67.9232	104.1	1130.56	582.324	97.666
DM	ED 04100085	1616.97	3277.15	107.156	590	561.955	651.542	186.873	261.767	99.9976	355.652	266	322.222	3.07627	16.3502	20	108.742	101.8	458.275	48.8808	107.28
DM	ED 02100088	1528.78	1204.39	132.179	350	517.867	152.009	80.5218	355.237	89.7955	213.649	76	192.096	3.71521	12.0979	27.5	72.45	106.5	479.969	21.5296	11.197
NDM	ED 01100018	625	300	50.1373	85	450.825	131.651	26.0338	2781.74	30	151.953	28	24.9949	3.72292	12	474.67	38.4645	120.3	527.094	7.33798	34.501
NDM	ED 01100019	350	320	41.6525	140	106.756	271.49	23.2849	1596.76	26	32.0262	24	55.2608	3.74714	12	471.302	54.0914	117.7	468.163	150.151	60.234
NDM	ED 03100023	425	380	42.0203	140	114.165	285.724	20.5357	546.033	70	44.9991	40.5	24.9949	3.69878	14	235.049	104.924	119	509.415	7.44469	16.232
NDM	ED 01100039	650	320	31.8967	180	129.685	146.533	13.6612	637.71	176	69.186	23	48.761	3.74714	8	421.481	108.837	119	546.768	22.4507	27.771
NDM	ED 02100048	400	600	50.7268	115	73.3122	330.146	19.8484	2344.08	28	201.513	55	24.9949	3.67471	10.5	539.772	15.0365	121.6	675.77	7.44469	55.896
NDM	ED 03300055	225	280	53.4845	95	200.855	346.827	15.7238	2107.04	24	6.18694	18	16.3788	3.53187	10	592.674	38.4645	120.3	617.964	7.33798	27.924
NDM	ED 01100061	475	450	44.8942	330	137.793	248.401	31.5305	477.815	108	61.7308	14	65.025	3.65072	16	532.819	116.664	120.3	452.461	116.996	36.55
NDM	ED 04100070	550	380	36.6877	575	1033.14	273.843	31.5305	283.368	149	17.2434	57	52.01	3.67471	23	496.703	54.0914	76.17	383.568	643.639	20.638
NDM	ED 03300075	425	300	49.5525	90	137.793	721.298	19.161	553.641	22	13.555	76.5	5.62827	3.74714	12	510.385	38.4645	116.4	468.163	100.718	37.149
NDM	ED 01100077	300	500	45.517	485	106.756	80.1308	31.5305	2903.73	44	8.02787	15	50.9267	3.79579	19	539.772	69.7248	101.8	437.523	254.19	17.234
NDM	ED 01100078	425	380	62.4796	62.5	121.808	24.4143	26.0338	18.7666	24	2.50726	26	50.8115	3.55549	14.5	598.038	34.5588	112.6	439.929	84.6434	50.005
NDM	ED 03100082	725	260	63.9573	60	129.685	17.6988	46.6393	839.133	22	32.0262	19	40.1067	3.57918	25	560.772	38.4645	119	645.82	7.44469	14.918
NDM	ED 01100020	550	660	54.5453	120	92.653	104.24	50.758	1253.19	58	28.3261	41	122.876	3.6268	21	494.999	46.2771	122.9	545.5	201.337	48.948
NDM	ED 06100090	250	420	47.4233	70	163.483	259.847	9.53543	976.827	24	95.3699	36	33.625	3.69878	11	369.77	54.0914	121.6	645.82	21.894	35.763
NDM	ED 01100096	575	440	61.2179	70	121.808	320.05	15.0363	335.333	26	19.0887	17	16.3788	3.39171	12	592.674	15.0365	110.1	445.94	201.337	87.826
NDM	ED 01100098	275	280	46.1462	80	1014.15	246.136	21.9104	515.657	20	11.7119	13	14.2269	3.57918	12	566.056	38.4645	116.4	645.82	37.6769	8.353
NDM	ED 02100099	675	380	61.9922	75	191.184	271.49	32.9045	447.645	18	20.9348	20	48.761	3.72292	13	529.351	93.1872	121.6	634.299	218.773	14.273
NDM	ED 03300112	325	730	30.8398	212.5	437.021	179.775	469.382	2779.49	1005	35.7291	14	20.6851	3.82023	23	584.863	67.805	116.4	444.177	150.151	30.03
NDM	ED 05100113	325	320	60.2593	82.5	99.5851	223.912	28.7823	35.0761	26	6.18694	20.5	12.076	3.52008	14	592.674	42.3706	120.3	441.167	133.475	119.7
NDM	ED 01100114	525	460	61.2179	110	252.404	292.948	19.8484	259.2	32	37.5817	22	12.076	3.57918	19	599.829	61.9073	119	921.897	218.773	86.827
NDM	ED 02100120	775	580	28.3257	225	172.496	204.103	43.893	302.635	36	944.614	20	166.926	7.78127	134	557.258	277.483	120.3	546.768	22.4507	94.503
NDM	ED 06200122	1262.5	860	47.4233	242.5	222.703	38.0568	87.7915	591.769	68	182.395	129	83.516	4.56097	32	515.54	222.493	120.3	561.77	407.541	121.38
NDM	ED 02100123	487.5	460	57.5376	110	3093.83	369.155	34.9652	85.6336	36	28.3261	59	18.5315	3.69878	22	581.986	61.9073	117.7	438.161	68.7764	143.012
NDM	ED 06100129	262.5	240	62.5774	75	939.418	240.506	17.7862	56.7077	26	2.50726	26	11.0008	3.59106	12	614.21	42.3706	116.4	460.711	133.475	140.96
NDM	ED 01100130	300	400	34.3516	102.5	383.611	308.783	24.6594	4034.3	64	80.3903	8	13.1513	3.63875	11	237.514	65.8158	121.6	645.82	7.33798	41.31
NDM	ED 01100219	525	260	31.1888	165	191.184	345.531	16.4113	235.845	34	284.532	22	18.5315	3.89399	10	560.772	30.6535	116.4	468.163	7.44469	37.106
NDM	ED 01100149	300	460	63.2648	450	99.5851	98.051	16.4113	186.45	32	241.894	19.5	32.5455	4.00588	12	550.245	30.6535	117.7	617.964	84.6434	44.573
NDM	ED 01100034	275	300	43.2133	85	172.496	116.369	16.4113	768.98	26	43.1437	39	24.9949	3.57918	11	560.772	26.7486	119	546.768	7.33798	29.577
NDM	ED 01100157	325	460	53.5724	355	653.428	101.63	31.5305	2140.47	26	93.4949	17	18.5315	3.89399	11	571.353	38.4645	122.9	527.094	36.22	120.008
NDM	ED 03200071	700	410	57.261	110	317.29	189.974	32.9045	474.039	46	43.1437	27	39.0258	3.60295	22	564.293	494.282	121.6	450.286	53.1198	94.381
NDM	ED 01100162	275	480	38.5885	85	333.172	419.789	37.7126	972.87	22	33.8773	34	24.9949	3.65072	11	529.351	54.0914	122.9	479.969	7.44469	3.149
NDM	ED 04100169	275	280	52.9596	60	409.952	446.883	27.4081	485.372	18	50.5699	48	53.0934	3.55549	10	573.121	46.2771	115.1	493.714	22.4507	108.531
NDM	ED 01100231	1025	280	34.6052	70	210.741	330.146	26.0338	839.133	80	8.02787	15	15.3027	3.60295	13	226.258	38.4645	121.6	450.286	22.4507	67.122
NDM	ED 04100171	650	620	60.0688	175	1033.14	44.3006	17.7862	925.486	41	12.1823	23	24.9949	3.6268	11	461.233	30.6535	117.7	527.094	7.44469	33.25
NDM	ED 02100175	275	340	48.7257	62.5	464.805	150.329	214.862	492.934	26	35.7291	14	40.1067	3.6268	11	557.258	42.3706	120.3	436.94	21.894	14.679
NDM	ED 02100210	325	380	40.0629	145	121.808	243.878	23.2849	576.5	22	24.629	22	29.3082	3.65072	11.5	505.243	22.8442	120.3	444.177	7.33798	7.363
NDM	ED 01100237	650	280	40.2769	65	1310.86	87.5102	17.7862	901.869	198	99.122	29	27.1511	3.77143	4	578.436	7.23038	121.6	445.94	68.7764	38.229
NDM	ED 05100186	275	340	62.3819	107.5	629.911	317.546	17.7862	283.368	16	69.186	9	5.1003	3.6268	10.5	603.415	38.4645	120.3	470.673	37.6769	116.525
NDM	ED 02100188	325	520	24.2382	170	813.592	549.514	152.788	2629.36	96	39.4349	11	31.4662	3.77143	11	375.058	13.287	122.9	675.77	7.44469	28.064
NDM	ED 01100242	350	140	32.4966	40	1898.18	70.6305	76.8252	3625.01	48	28.3261	72.5	7.77662	3.96841	18	667.967	15.0365	110.1	437.523	37.6769	136.472
NDM	ED 01100243	200	480	40.2769	180	1052.25	22.4302	10.9108	1648.29	12	43.1437	33	42.269	3.86933	19	567.82	116.664	121.6	663	236.392	93.818
NDM	ED 01100200	137.5	380	44.4311	107.5	439.719	42.2908	61.7375	1183.81	16	114.159	31	28.2296	3.72292	13	545.002	34.5588	121.6	568.458	36.22	62.973
NDM	ED 03300246	650	440	55.6206	100	321.04	38.0568	38.3994	538.43	30	76.6526	23	27.1511	3.65072	20	515.54	46.2771	261.3	242.24	659.6	110.302
NDM	ED 01100212	200	360	54.1901	100.362	172.496	177.758	12.286	122.86	4.91441	6.18694	46	24.9949		27.5		7.23038	121.6	450.286	22.4507	87.33

## Sheet: 2
Diabetes Status	ID	IFNg	TNFa	IL-2	IL-17A	IL-17F	IL-6	IL-7	IL-8	IL-12	IL-1b	GM-CSF	G-CSF	IL-4	IL-5	IL-10	IL-13	TGFb
DM	ED 01100064	405.269	438.157	126.789	200	941.869	461.443	35.4642	1103.08	85.2776	124.41	48	124.441	4.07345	8.90585	623.502	63.3986	13.116
DM	ED 05100065	460.173	649.918	138.002	190	813.262	449.779	35.4642	978.801	85.965	139.125	44	130.577	4.05254	9.28276	619.058	67.9232	16.638
DM	ED 04200066	789.091	692.37	127.732	240	1189.09	441.117	38.1123	1006.15	87.1322	146.506	54	142.857	4.03175	9.66136	605.773	72.45	47.109
DM	ED 03300067	515.053	607.499	128.995	210	406.394	441.117	40.7606	831.063	86.662	142.813	55	152.075	4.03175	9.53498	588.164	95.1162	72.41
DM	ED 05100068	624.741	607.499	101.706	180	870.778	441.117	38.1123	924.551	86.1962	135.44	52	161.3	4.05254	9.34575	614.622	76.9789	74.588
DM	ED 06200076	1117.14	905.132	125.536	225	1002.82	412.783	38.1123	911.083	88.0855	161.316	68	106.051	3.94977	10.1688	583.78	72.45	9.144
DM	ED 01100079	1607.61	905.132	114.825	270	743.22	297.803	54.0068	302.377	87.1322	176.189	66	124.441	3.88953	10.4236	544.668	67.9232	8.372
DM	ED 06100118	789.091	607.499	107.156	280	377.407	438.247	51.357	837.68	87.6067	153.903	70	158.225	3.94977	9.47185	601.359	76.9789	11.05
DM	ED 01100119	130.386	353.688	113.629	190	757.34	461.443	27.522	1019.88	84.8248	120.741	98	155.15	4.1369	8.53061	636.879	54.3558	17.437
DM	ED 04100121	1253.58	2024.77	29.6292	200	668.236	64.4444	43.4093	549.803	88.8119	204.247	54	106.051	4.03175	8.6555	527.48	54.3558	18.232
DM	ED 04100124	185.411	353.688	61.0269	200	663.75	330.146	19.5824	710.8	84.1539	142.813	56	87.6871	4.09448	8.40591	596.953	45.3216	32.456
DM	ED 01100125	185.411	353.688	79.3876	220	839.359	342.947	15.6137	460.287	83.9324	142.813	40	99.9265	4.01107	8.40591	610.194	58.876	81.99
DM	ED 06100126	432.724	522.761	83.2435	220	806.79	342.947	40.7606	574.015	85.7348	131.759	56	112.178	4.07345	9.15694	596.953	63.3986	6.599
DM	ED 05100127	624.741	438.157	51.4916	220	272.38	66.5925	32.8165	308.215	87.1322	217.417	42	93.8053	4.03175	8.6555	575.036	63.3986	52.004
DM	ED 04100132	515.053	353.688	148.656	220	704.562	435.384	30.1691	917.812	86.662	224.964	49	149.002	4.07345	9.78793	652.571	79.2442	29.054
DM	ED 01100135	652.148	522.761	140.3	340	933.288	358.575	27.522	976.897	84.8248	150.202	22	75.4595	3.97009	8.40591	566.322	52.0964	226.429
DM	ED 05100137	405.269	522.761	98.609	230	666.739	452.682	35.4642	897.652	85.7348	131.759	55	136.715	4.05254	8.96855	596.953	63.3986	3.324
DM	ED 05100139	75.3362	607.499	156.205	190	953.935	415.579	24.8751	92.6746	83.9324	124.41	30	75.4595	4.11563	8.28139	588.164	45.3216	14.798
DM	ED 05100140	569.909	565.113	110.96	260	779.516	418.384	69.9122	791.558	86.4286	146.506	50	112.178	4.01107	9.0313	623.502	58.876	100.599
DM	ED 01100144	460.173	1548.38	68.5204	685	766.812	124.392	48.7075	4008.38	86.662	179.917	62	106.051	3.86969	8.28139	579.405	52.0964	87.74
DM	ED 01100145	460.173	522.761	116.328	270	638.558	432.53	40.7606	965.182	87.1322	139.125	76	142.857	4.05254	9.15694	610.194	67.9232	43.025
DM	ED 06100147	240.411	480.442	18.1297	130	723.014	366.498	22.2286	1089.12	84.8248	117.077	32	87.6871	4.15829	8.6555	614.622	54.3558	100.107
DM	ED 06200150	350.341	565.113	115.425	285	746.348	251.815	14.2909	161.711	83.9324	172.465	34	87.6871	3.91952	8.53061	566.322	58.876	74.262
DM	ED 01100159	405.269	269.353	93.0881	150	724.56	379.866	40.7606	384.919	84.8248	150.202	26	124.441	3.81088	8.28139	575.036	45.3216	29.684
DM	ED 01100046	1171.74	649.918	101.99	230	529.435	34.5784	51.357	414.827	86.662	206.126	76	121.374	3.97009	9.28276	601.359	58.876	13.6
DM	ED 01100049	350.341	438.157	134.106	170	758.915	458.515	32.8165	1047.46	85.2776	128.083	36	229.147	4.11563	8.78058	632.413	63.3986	46.67
DM	ED 03200054	405.269	480.442	153.438	190	518.573	464.38	34.1403	1145.19	86.4286	139.125	40	87.6871	3.99052	9.0313	623.502	67.9232	4.409
DM	ED 04100074	1389.86	947.784	109.49	290	86.3469	322.562	56.657	499.777	123.155	172.465	76	173.61	3.78187	10.9354	291.493	86.0433	53.541
DM	ED 03300111	240.411	227.236	60.1142	390	1022.29	278.571	22.2286	646.041	84.3765	198.618	136	81.5718	4.05254	8.15706	605.773	45.3216	2.728
DM	ED 06200146	295.388	332.591	161.105	100	1329.81	494.208	16.9365	1201.87	84.3765	113.416	22	63.2438	4.21228	8.40591	654.821	63.3986	67.755
DM	ED 04200154	1716.34	1033.19	114.227	300	587.656	352.028	67.2606	599.054	89.548	181.783	78	167.454	3.83036	11.0639	570.676	81.51	5.825
DM	ED 03300161	1362.62	1204.39	102.558	335	1025.97	189.974	69.9122	524.377	91.0494	187.386	62	229.147	3.88953	10.6791	518.93	95.1162	42.155
DM	ED 01100003	2959.91	1075.94	96.9379	330	391.528	29.107	32.8165	159.655	99.7094	161.316	36	130.577	3.47157	8.28139	402.347	124.663	5.287
DM	ED 01100013	405.269	777.375	69.9637	790	730.408	187.919	35.4642	1731.56	86.662	191.126	137	124.441	3.92957	8.28139	570.676	58.876	12.909
DM	ED 01100017	240.411	353.688	81.4344	345	959.147	271.49	24.8751	355.237	86.1962	131.759	48	121.374	4.09448	8.40591	627.954	54.3558	22.089
DM	ED 02100021	295.388	353.688	56.9614	360	329.54	255.245	22.2286	1810.05	114.737	221.189	36	87.6871	4.05254	8.28139	223.203	49.8376	7.242
DM	ED 01100022	130.386	269.353	142.284	135	577.641	429.684	24.8751	965.182	89.0562	142.813	22	112.178	4.15829	8.40591	119.792	49.8376	11.076
DM	ED 01100024	322.867	395.906	40.1704	185	847.498	345.531	26.1985	444.962	86.662	126.246	96	112.178	4.07345	8.28139	544.668	54.3558	174.231
DM	ED 01100035	1117.14	1721.16	125.536	1010	667.984	222.872	35.4642	417.82	88.5687	353.698	114	93.8053	3.62249	8.78058	623.502	58.876	9.253
DM	ED 03100037	185.411	395.906	75.3597	240	363.672	327.61	56.657	161.408	84.3765	139.125	86	118.308	4.07345	8.28139	601.359	49.8376	29.354
DM	ED 01100038	679.548	883.818	134.752	1990	300.845	448.33	14.2909	837.288	87.1322	172.465	52	106.051	3.90949	9.28276	583.78	117.836	39.837
DM	ED 05100084	624.741	692.37	58.08	240	619.722	189.974	46.0582	624.241	87.1322	161.316	110	136.715	4.00078	9.0313	588.164	63.3986	62.197
DM	ED 04100085	898.538	671.139	91.4592	525	71.4036	341.658	48.7075	870.904	91.0494	153.903	83	204.435	4.04213	10.2961	553.307	67.9232	102.773
DM	ED 02100088	624.741	1054.56	73.8718	480	405.016	148.427	39.4364	1521.03	86.1962	174.327	38	124.441	3.97009	9.09409	542.513	90.5786	71.493
NDM	ED 01100018	160.75	105.252	100	99	524.65	63	8.72	84	8.4	87	20.5003	156	0.21	12.86		360.401	32.13
NDM	ED 01100019	952	563.92	83.8	139.6	310.481	282	1.63	376	37.6	278	0.50731	31.92	0.94	1.58		4336.8	67.29
NDM	ED 03100023	776.5	292.454	157	124	334.641	291	2.1	388	38.8	312	20.2392	26.66	0.97	1.24	84.2018	266.488	106.6
NDM	ED 01100039	5768	492.363	177	90.6	351.153	153	1.21	204	20.4	1280	8.33252	11.6	0.51	0.9	451.136	290.45	37.12
NDM	ED 02100048	490	143.618	83.3	87	429.891	135	20	180	18	162	5.0271	13.96	0.45	1.07	233.963	302.051	38.19
NDM	ED 03300055	319.75	255.595	72	77	238.397	90	5.82	120	12	250	13.867	25.16	0.3	14.25	393.891	336.689	44.46
NDM	ED 01100061	552	255.595	93	247.6	116.464	354	14.35	472	47.2	258	10.8331	43.48	1.18	7.99	114.894	2494.98	41.38
NDM	ED 04100070	836.75	292.454	116.5	198.6	291.417	450	1.9	600	60	288	31	30.98	1.5	4	204.476	549.426	17.44
NDM	ED 03300075	2621.25	118.403	75.5	79	300.051	75	20	100	10	288	21.9264	33.04	0.25	4	204.476	333.125	53.24
NDM	ED 01100077	166	138.958	91.3	77.6	42.6833	150	20	2400	240	116	10.6342	16.46	6	4	233.963	398.75	39.11
NDM	ED 01100078	160.75	111.462	51	58	321.989	63	1.16	84	8.4	127	3.24385	59.72	0.21	1.24	94.7225	351.169	13.73
NDM	ED 03100082	294.75	228.077	105.8	65	16.6617	105	3.26	140	14	246	17.5803	14.92	0.35	7.42	111.166	258.772	15.1
NDM	ED 01100020	936.25	200.284	94.5	141	0.982659	330	10.01	440	44	242	31	23.08	1.1	9.92	89.1694	604.239	175.68
NDM	ED 06100090	191	468.202	86	167	34.5779	384	20	512	51.2	224	3.5886	28.34	1.28	4	182.461	2394.95	5.75
NDM	ED 01100096	258.25	134.481	70.3	57	286.875	120	20	160	16	83	3.30044	6.7	0.4	4	160.227	360.401	50.18
NDM	ED 01100098	113	143.618	71.5	71	203.199	84	1.27	112	11.2	97	31	8.78	0.28	4	374.562	336.689	10.23
NDM	ED 02100099	166	143.618	77.5	76	207.294	75	5.72	100	10	214	3.32317	13.38	0.25	7.61	107.585	298.709	31.5
NDM	ED 03300112	122.5	275.26	99	134	489.592	396	20	528	52.8	334	21.5697	31.16	1.32	4	114.894	7406.08	76.92
NDM	ED 05100113	113	126.076	87.3	55	294.758	48	20	64	6.4	117	21.5149	6.48	0.16	4	114.894	315.64	17.44
NDM	ED 01100114	83.5	138.958	60.8	57.6	844.243	105	1.63	140	14	94	17.4277	5.6	0.35	1.4	220.208	360.401	43.34
NDM	ED 02100120	294.75	181.362	74.5	67	625.385	150	9.49	200	20	186	31	18.56	0.5	7.99	100.861	282.327	114.48
NDM	ED 06200122	928.5	433.337	66	188.6	396.153	342	20	456	45.6	259	19.618	21.96	1.14	4	111.166	219.727	37.45
NDM	ED 02100123	675	114.841	69.5	79.6	829.206	150	2.46	2400	240	52	11.2463	156	6	4.24	145.09	369.775	15.36
NDM	ED 06100129	409.5	200.284	66.3	117	1060.65	129	7.98	172	17.2	186	65.4217	13.38	0.43	11.09	346.669	440.048	63.91
NDM	ED 01100130	122.75	468.202	87.5	208	201.16	411	2.93	548	54.8	222	3.64727	30.98	1.37	2.98	91.8727	65.602	10.74
NDM	ED 01100219	422.75	200.284	70.3	128	517.071	150	36.19	200	20	490	1.78942	16.66	0.5	19.27	160.227	222.193	14.41
NDM	ED 01100149	154.5	456.397	105	214.6	479.233	909	20	1212	121.2	337	5.28116	48.7	3.03	4	374.562	2739.7	38.44
NDM	ED 01100034	113	134.481	82	68	300.425	180	3.86	2400	240	90	3.04315	8.18	6	4.24	160.227	369.775	28.42
NDM	ED 01100157	594.25	275.26	84.5	113	371.851	267	20	356	35.6	288	14.025	19.5	0.89	1.07	365.118	1856.54	218.11
NDM	ED 03200071	47	143.618	70.8	66	37.3135	78	8.97	104	10.4	104	21.2073	12	0.26	14.05	107.585	333.125	48.44
NDM	ED 01100162	106	433.337	91	173	245.127	411	4.7	548	54.8	311	16.234	46.96	1.37	8.95	220.208	5137.01	29.04
NDM	ED 04100169	814	348.432	86.3	169	733.299	309	3.34	412	41.2	152	12.4675	19.5	1.03	6.85	114.894	79.6745	26.42
NDM	ED 01100231	651.5	310.38	75	145.6	37.9571	258	11.38	344	34.4	171	9.00683	14.34	0.86	33.05	346.669	37.888	39.9
NDM	ED 04100171	122.75	942.953	100.8	216	53.5463	522	13.58	696	69.6	299	9.38464	68.62	1.74	26.46	278.746	7082.88	15.86
NDM	ED 02100175	227.5	1606.25	106.5	248	386.381	576	2.03	768	76.8	369	4.00619	51.82	1.92	6.01	248.304	1271.99	35.04
NDM	ED 02100210	409.5	310.38	89	123	120.978	162	1.27	216	21.6	224	3.43829	20.64	0.54	3.07	754.363	1312.85	22.08
NDM	ED 01100237	108	175.421	51.5	101	325.703	78	2.39	104	10.4	42	7.55057	6.9	0.26	2.36	1285	708.663	19.06
NDM	ED 05100186	490	250.844	95.3	121.6	453.603	222	4.51	296	29.6	459	21.8266	15.5	0.74	13.06	248.304	282.327	117.15
NDM	ED 02100188	186	480.191	77.5	148.6	1008.06	348	2.03	464	46.4	209	17.7436	34.36	1.16	2.09	140.337	1969.55	40.75
NDM	ED 01100242	545.25	255.595	68	131	1176.22	276	1.16	368	36.8	320	114.434	16.46	0.92	2.62	200.675	251.19	88
NDM	ED 01100243	93	175.421	45	81	40.5614	1800	3.95	2400	240	390	20.4151	156	6	5.17	384.153	176.488	8.77
NDM	ED 01100200	928.5	266.938	88.5	149	1149.89	417	20	556	55.6	218	50.4571	23.28	1.39	4	204.476	2032.95	41.56
NDM	ED 03300246	675	148.461	97	107	918.981	1800	2.32	2400	240	390	220.799	156	6	3.61	140.337	379.291	11.12
NDM	ED 01100212	345	258.8	60.8	119	292.5	120	7.09	160	16	108	3.24385	9.8	0.4	13.4069	213.551	92.7258	14.43

## Sheet: 6
Diabetes Status	ID	IFNg	TNFa	IL-2	IL-17A	IL-17F	IL-6	IL-7	IL-8	IL-12	IL-1b	GM-CSF	G-CSF	IL-4	IL-5	IL-10	IL-13	TGFb
DM	ED 01100064	600	540	30.1515	165	142.016	250.606	46.6393	290.774	58	133.475	78.5	68.2837	1.86146	11	538.031	269.016	31.115
DM	ED 05100065	425	420	44.585	145	161.128	162.301	32.9045	129.201	30	540.668	47.5	63.9393	1.88571	9	553.749	276.874	16.057
DM	ED 04200066	275	280	54.7234	75	137.926	136.394	16.4113	275.968	20	249.121	23	9.92585	1.78366	5	585.543	292.772	31.339
DM	ED 03300067	625	500	49.5525	122.5	133.73	163.603	39.773	350.232	50	22.4507	38	35.7847	1.87357	11.5	522.434	261.217	20.748
DM	ED 05100068	950	480	50.8115	135	120.409	180.867	35.6521	191.289	32	37.338	73	24.9949	1.92237	11.5	525.89	262.945	105.623
DM	ED 06200076	275	280	55.0811	155	188.232	166.22	24.6594	1564.98	24	167.023	23	18.5315	1.82536	6	522.434	261.217	44.67
DM	ED 01100079	350	400	33.8488	137.5	94.8315	182.22	30.758	231.69	71	37.6769	130.5	20.6851	1.84939	7.5	481.423	240.711	83.203
DM	ED 06100118	375	760	52.1791	180	129.42	320.204	20.5357	1948.21	31	84.6434	35	33.625	1.95936	7	505.243	252.622	76.867
DM	ED 01100119	887.5	260	34.8603	135	129.42	447.792	26.6869	1948.21	125	105.173	15	53.0934	1.91012	5.5	135.554	67.7768	12.962
DM	ED 04100121	775	560	39.9207	150	142.016	174.155	44.5796	165.671	42	22.4507	64	85.6954	1.97177	13	508.67	254.335	55.738
DM	ED 04100124	250	300	61.6042	185	129.42	208.611	24.6594	307.57	28	68.7764	17	6.70233	1.78959	5.5	580.211	290.105	34.405
DM	ED 01100125	725	480	28.0043	255	153.726	220.108	82.861	515.657	39	84.6434	60	78.071	2.04697	9.5	536.293	268.146	88.989
DM	ED 06100126	325	300	51.7489	102.5	181.78	145.695	24.6594	56.7077	28	37.4447	42	18.5315	1.82536	7	578.436	289.218	10.706
DM	ED 05100127	450	340	28.9235	152.5	146.008	204.358	19.8484	268.574	56	53.1198	28	53.0934	1.8979	7	560.772	280.386	25.22
DM	ED 04100132	425	390	61.0253	85	249.753	149.472	19.8484	71.1587	24	84.6434	21	6.70233	1.84337	6.5	596.248	298.124	43.756
DM	ED 01100135	550	200	52.4383	197.5	153.726	220.108	27.4081	63.9302	32	84.6434	12.5	31.4662	1.91012	6.5	467.94	233.97	33.79
DM	ED 05100137	575	340	46.9415	325	137.926	207.19	54.8015	151.066	36	218.773	33	33.625	1.87357	3.5	355.49	177.745	25.721
DM	ED 05100139	1125	400	46.6222	330	194.502	251.368	37.0258	0	52	748.92	36	42.269	1.98421	7.5	471.302	235.651	48.255
DM	ED 05100140	650	160	35.8956	320	133.73	148.21	41.1464	1589.92	66	260.692	33	50.9267	1.75416	10	557.258	278.629	65.623
DM	ED 01100144	925	540	30.8398	100	146.008	132.731	52.1307	67.5437	70	37.6769	27	164.716	2.12992	14.5	508.67	254.335	56.635
DM	ED 01100145	800	520	31.3059	175	153.726	179.517	72.7114	172.983	38	100.718	45	81.3374	1.82536	16.5	560.772	280.386	55.32
DM	ED 06100147	350	320	37.9695	100	229.021	178.171	58.9932	372.625	18	236.392	93	31.4662	1.82536	6	545.002	272.501	31.299
DM	ED 06200150	625	220	53.2216	195	129.42	93.7718	80.82	180.301	78	84.6434	11	133.857	1.86146	9.5	355.553	177.777	123.952
DM	ED 01100159	650	500	51.9207	165	115.335	156.483	37.0704	216.978	20	37.6769	115	107.537	2.07233	4.5	393.904	196.952	14.018
DM	ED 01100046	825	440	50.0534	190	102.302	233.314	54.876	372.625	38	1499.34	110	96.6054	2.13637	14.5	434.639	217.32	19.808
DM	ED 01100049	350	620	35.8956	255	91.1416	262.909	32.9045	308.313	30	150.151	33	98.7899	1.84939	5.5	464.584	232.292	46.945
DM	ED 03200054	800	200	48.3977	350	96.8152	268.362	22.3091	395.07	72	100.718	69	42.269	1.88571	12.5	437.943	218.972	49.193
DM	ED 04100074	237.5	320	51.7489	115	102.302	252.895	50.758	268.574	40	68.7764	61	107.537	1.98421	9.5	474.67	237.335	10.36
DM	ED 03300111	600	700	91.8189	230	102.302	316.026	32.1051	374.775	22	581.337	27	61.7684	1.87357	7	541.514	270.757	13.89
DM	ED 06200146	875	520	55.8012	245	112.799	276.227	41.1464	402.564	32	184.085	65	63.9393	2.0092	12.5	532.819	266.409	20.992
DM	ED 04200154	825	580	55.9822	275	104.983	361.41	45.2662	553.641	52	22.4507	66	98.7899	2.02175	11	505.243	252.622	29.654
DM	ED 03300161	725	660	51.9207	240	85.256	400.913	49.3852	387.583	66	37.6769	78	68.2837	1.88571	7.5	454.55	227.275	18.364
DM	ED 01100003	825	480	45.0493	235	127.565	363.17	72.7114	470.264	20	68.7764	99	29.3082	1.75416	9.5	543.257	271.628	29.33
DM	ED 01100013	875	300	54.6343	100	102.302	184.937	32.2175	187.625	68	664.189	22.5	15.3027	1.77774	6.5	255.757	127.878	2.853
DM	ED 01100017	175	380	41.2872	195	229.66	191.792	41.1464	216.978	80	7.33798	54	42.269	1.87357	5.5	557.258	278.629	2.431
DM	ED 02100021	250	500	43.6671	310	85.256	279.398	21.9104	681.91	90	37.6769	49	29.3082	1.91012	5.5	467.94	233.97	42.016
DM	ED 01100022	387.5	420	37.7648	240	428.331	225.942	42.5197	2522.63	126	37.6769	120	48.761	1.86146	55	147.812	73.906	47.046
DM	ED 01100024	325	310	52.6416	212.5	150.202	167.321	64.4815	1020.45	84	7.33798	51.5	129.462	3.49159	6.5	214.613	107.306	17.579
DM	ED 01100035	725	980	33.5376	160	271.501	333.719	38.3994	342.779	89	22.4507	37	83.516	1.95936	14	421.481	210.741	19.808
DM	ED 03100037	187.5	720	46.3045	175	283.633	223.748	53.5034	313.027	54	21.894	60	74.8067	2.08506	18.25	512.102	256.051	10.333
DM	ED 01100038	525	560	57.8152	160	448.651	172.159	41.1464	172.983	55	7.33798	39	53.0934	1.93467	16	529.351	264.676	70.83
DM	ED 05100084	875	660	52.7855	147.5	559.439	171.495	50.758	85.6336	50	100.718	44	83.516	1.99669	15.5	518.984	259.492	44.235
DM	ED 04100085	500	410	57.169	102.5	409.337	153.283	28.7823	165.671	35	272.164	27	31.4662	1.86751	11.5	557.258	278.629	132.258
DM	ED 02100088	300	320	30.5514	70	442.276	191.792	20.5357	151.066	22	84.6434	33	44.4321	1.78959	5.5	596.248	298.124	65.33
NDM	ED 01100018	1528	445.8	24.5	94	164.722	232	46	232	28.1013	175	8.60862	22.27	1.16	9.46189	92	808	31.78
NDM	ED 01100019	650.5	311.3	21.7	64.8	146.008	158	26.6	158	25.4648	141	2.93703	14.61	0.79	3.11354	53.2	2024	69.42
NDM	ED 03100023	485.25	189.5	14.5	58.5	137.926	162	73.7	162	12.5086	153	9.45367	14.75	0.81	8.59907	147.4	736	20.68
NDM	ED 01100039	1669.25	445.8	57	91	278.363	870	44.3	870	54.5356	521	20.189	19.89	4.35	5.11318	88.6	3195	21.42
NDM	ED 02100048	862.25	437	19.7	66.8	175.127	192	97.6	192	29.1353	151	0.664572	24.1	0.96	1.50744	195.2	7808	28.14
NDM	ED 03300055	463.75	123.5	34.8	24.8	146.008	110	6	110	2.14828	160	21.3634	14.89	0.55	1.14606	12	136	15.68
NDM	ED 01100061	185	82.3	30.4	55	191.389	82	58.2	82	19.4406	74	35.9115	8.84	0.41	5.43315	116.4	59	475.28
NDM	ED 04100070	1371	281.6	32.2	67.3	146.008	714	200	714	31.3675	243	29.837	35.19	3.57	1.26266	400	10863	22.52
NDM	ED 03300075	236	74	16.5	24.3	261.996	80	9.6	80	5.79272	96	3.0009	11.78	0.4	0.924676	19.2	3400	37.68
NDM	ED 01100077	247.75	140	48.8	29.5	153.726	54	52.9	54	6.10743	58	2.61292	8.99	0.27	8.97939	105.8	3400	24.62
NDM	ED 01100078	862.25	319.8	22.9	69	120.409	242	26.6	242	35.5928	186	32.2489	24.52	1.21	3.62249	53.2	6384	299.14
NDM	ED 03100082	456.75	152.3	40.2	67	218.033	114	41.8	114	19.7233	110	54.7382	16.28	0.57	6.7796	83.6	948	52.38
NDM	ED 01100020	146	264.7	24.1	78.3	168.251	212	19.1	212	28.3963	108	43.7761	21.71	1.06	3.90546	38.2	1702	111.48
NDM	ED 06100090	328.25	206.1	24.7	64.5	129.42	120	22	120	16.9146	84	99.7046	16.28	0.6	9.07526	44	199	23.14
NDM	ED 01100096	421.75	260.5	14.8	46.5	146.008	98	20.6	98	14.8357	104	11.3734	17.95	0.49	1.38314	41.2	515	18.7
NDM	ED 01100098	241.75	148.2	12.3	33	161.128	94	67.2	94	4.58979	139	0.606476	9.15	0.47	7.22099	134.4	57	4.54
NDM	ED 02100099	845.25	231.1	33.5	69	153.726	246	11.5	246	29.1353	311	9.36806	26.94	1.23	1.03338	23	346	31.88
NDM	ED 03300112	132.75	82.3	21.7	27.3	191.389	44	13.5	44	4.54704	172	18.6863	14.61	0.22	1.50744	27	49	94.08
NDM	ED 05100113	224.25	49.1	26	33	168.251	82	44.3	82	11.7175	64	3.35999	6.28	0.41	3.11354	88.6	340	8.74
NDM	ED 01100114	619.25	264.7	13	52.8	171.718	144	76.5	144	12.7807	428	5.68884	15.17	0.72	4.34443	153	617	49.62
NDM	ED 02100120	1508	336.9	23.7	90.8	249.753	396	107.5	396	29.58	212	6.14229	27.38	1.98	9.70601	215	728	66.36
NDM	ED 06200122	1351.5	367.1	29.1	55	110.784	328	9.6	328	27.6596	290	11.0351	37.02	1.64	1.38314	19.2	1340	81.96
NDM	ED 02100123	137.75	242	23.1	29.5	146.008	32	12.8	32	9.40978	180	5.65237	9.15	0.16	0.82	25.6	40	42
NDM	ED 06100129	99.25	36.4	9.8	36	807	46	13.5	46	1.60185	82	11.4588	9.74	0.23	1.03338	27	42	61.5
NDM	ED 01100130	168.75	40.6	26.6	38	129.42	56	16.3	56	24.0141	119	10.2353	8.84	0.28	1.76735	32.6	51	37.9
NDM	ED 01100219	259.75	148.2	18.5	40	212.359	102	28.9	102	13.463	177	18.2876	9.74	0.51	1.38314	57.8	61	3.06
NDM	ED 01100149	118	49.1	23.1	43.5	197.573	44	12.8	44	35.5928	90	3.08893	5.22	0.22	1.10051	25.6	75	16.86
NDM	ED 01100034	259.75	27.8	22.1	35.3	192.331	52	31.2	52	2.76309	86	23.0236	10.33	0.26	1.38314	62.4	40	26.42
NDM	ED 01100157	224.25	65.8	25.6	31.5	79.1251	70	12.2	70	10.0785	161	3.0009	9.74	0.35	1.26266	24.4	94	172.78
NDM	ED 03200071	212.75	98.8	17.1	33	94.0032	62	17.7	62	5.45531	190	5.87058	11.35	0.31	1.14606	35.4	44	119.22
NDM	ED 01100162	224.25	102.9	16.3	75.3	85.256	64	17.7	64	41.2915	134	18.0236	12.78	0.32	1.26266	35.4	40	52
NDM	ED 04100169	224.25	111.2	240	23.5	96.8152	74	141.3	74	2.87497	91	22.8311	12.21	0.37	16.587	282.6	87	41.81
NDM	ED 01100231	172	437	27.2	70.5	178.935	250	9.6	250	189.292	365	1.23437	20.03	1.25	0.924676	19.2	1270	37.25
NDM	ED 04100171	179.5	98.8	22.5	40	145.84	44	12.2	44	3.5158	84	28.1599	11.21	0.22	0.924676	24.4	42	113.15
NDM	ED 02100175	224.25	14.7	11	28	136.879	56	13.5	56	4.80598	99	4.48582	20.87	0.28	1.03338	27	40	192.75
NDM	ED 02100210	190.5	100	25.6	30.3	141.4	36	10.9	36	12.5086	60	7.06987	9.59	0.18	1.21555	21.8	40	37.25
NDM	ED 01100237	224.25	98.8	240	82.8	129.929	54	12.2	54	18.3138	55	12.0822	11.78	0.27	1.14606	24.4	340	21.05
NDM	ED 05100186	179.5	40.6	13.7	39	154.493	78	200	78	9.14305	172	9.79127	12.78	0.39	2.33093	400	340	30.1
NDM	ED 02100188	478	100	225.6	37.5	94.0032	50	63.6	50	24.0141	362	3.5794	21.99	0.25	5.71873	127.2	340	57.62
NDM	ED 01100242	922	285.8	18.7	73.5	148.03	368	61.8	368	33.6216	164	5.07566	27.09	1.84	2.88596	123.6	369	30.67
NDM	ED 01100243	108.25	222.8	14.1	56.5	65.9406	208	8.3	208	33.6216	187	13.539	24.1	1.04	1.50744	16.6	133	21.05
NDM	ED 01100200	132.75	100	240	22.3	125.174	36	70.9	36	21.2863	78	0.921076	4.65	0.18	3.90546	141.8	340	32.03
NDM	ED 03300246	650.5	90.6	11.4	53.5	312.733	152	23.5	152	43.6384	505	9.3754	15.86	0.76	2.63384	47	94	17.82
NDM	ED 01100212	619.25	202	21	51	88.2272	120	120	120	12.7807	185	2.34788	21.29	0.6			136	31.06

## Sheet: 18
Diabetes Status	ID	IFNg	TNFa	IL-2	IL-17A	IL-17F	IL-6	IL-7	IL-8	IL-12	IL-1b	GM-CSF	G-CSF	IL-4	IL-5	IL-10	IL-13	TGFb
DM	ED 01100064	168.77	211.18	62.3	130	91.879	265	3.02	56.1	19.05	16.13	91	13.67	3.44	14.73	137.7	403	127.412
DM	ED 05100065	299.76	39.59	73.99	110	113.136	238.7	2.22	13.02	18.52	14.47	75	9.99	0.98	15.34	51.4	159	90.6959
DM	ED 04200066	250.72	532.91	55.92	110	269.746	349.65	2.49	17.88	18.01	17.99	100	8.16	2.07	17.44	38	539	111.094
DM	ED 05100068	234.35	22.72	77.76	100	5.476	237.85	3.81	56.1	17.76	12.81	86.5	33.47	0.22	9.79	113.9	116	85.8468
DM	ED 06200076	223.43	43.82	74.33	250	246.109	176.45	6.59	84.4	23.91	23.82	115	51.66	21.72	18.82	137.7	403	100.697
DM	ED 01100079	270.07	116.15	69.33	130	21.3492	149.65	5.14	46.6	19.6	20.99	82	39.71	3.44	15.47	38	326	105.847
DM	ED 06100118	440.89	103.32	73.48	170	79.5908	191.4	6.73	60.82	26.59	20.42	99	98.41	3.44	16.62	267	3137	85.8468
DM	ED 01100119	185.18	52.28	71.97	145	526.66	219.75	4.08	93.8	17.71	18.36	83	12.44	5.06	10.94	89.6	204	95.6463
DM	ED 04100121	332.4	193.79	62.46	130	52.7964	194.75	3.02	32.3	20	20.61	112	46.93	0.98	16.21	38	301	71.9214
DM	ED 04100124	397.52	73.49	77.06	130	191.205	218.3	6.46	60.82	19.43	17.62	69.5	113.74	6.89	13.28	64.4	326	90.6959
DM	ED 06100126	435.48	94.78	73.15	120	176.02	218.95	3.28	145.24	21.64	16.13	121	95.81	2.07	17.03	113.9	2902	71.9214
DM	ED 04100132	228.89	103.32	74.33	120	404.023	207.2	3.55	70.28	18.31	13.91	107	21.68	2.07	13.8	195.4	351	90.6959
DM	ED 01100135	375.85	60.75	71.81	90	104.529	247.6	3.02	32.3	24.2	15.76	84	39.09	0.98	14.33	113.9	159	133.04
DM	ED 05100137	451.71	215.54	57.71	410	24.4468	188.1	5.67	37.08	21.38	28.21	91	30.04	2.07	15	89.6	567	85.8468
DM	ED 05100139	343.27	325.5	66.73	130	213.376	136.35	5.4	53.72	21.64	20.99	96	48.19	8.92	17.03	359	801	85.8468
DM	ED 05100140	103.01	64.99	70.65	120	42.198	89.55	17.09	75	28.27	18.74	62	55.13	24.75	15.14	267	3656	63.1707
DM	ED 01100144	656.46	172.12	68.02	180	75.1116	164.6	7.79	79.7	30.48	21.74	80	74.54	18.84	14.2	463.9	2222	133.04
DM	ED 01100145	152.34	73.49	63.55	145	125.048	259.45	5.67	205.6	22.55	27.44	114	49.45	3.44	22.21	113.9	801	67.4918
DM	ED 01100159	174.24	363.33	65.61	115	113.803	188.1	3.55	79.7	19.38	23.44	74.5	19.83	3.44	12.62	113.9	987	71.9214
DM	ED 01100046	223.43	18.52	79.15	110	91.898	218.3	2.22	410.32	18.01	13.36	53	22.91	2.07	9.66	267	987	85.8468
DM	ED 01100049	272.52	159.15	71.64	120	154.45	173.1	2.22	17.88	19.83	15.02	82	16.75	0.55	16.42	38	252	90.6959
DM	ED 03300111	354.13	39.59	68.35	140	11.9515	148.75	3.28	39.46	20	22.87	52	52.92	2.07	14.07	113.9	301	81.1004
DM	ED 06200146	381.05	189.45	69.66	165	26.0498	101.05	5.4	580.9	19.54	20.24	74	47.24	16.11	13.28	161.1	159	235.143
DM	ED 04200154	1050.35	150.53	64.97	255	3.84165	159.45	10.44	279.46	24.49	39.49	99	77.43	18.13	15	567.6	1896	150.477
DM	ED 03300161	237.08	10.11	80.91	130	314.837	218.3	2.49	35.72	17.24	12.44	14	97.11	0.98	8.91	38	987	85.8468
DM	ED 01100003	137.08	10.11	80.55	150	79.0685	218.3	1.96	35.72	17.15	12.07	12.5	69.43	0.22	9.28	137.7	987	90.6959
DM	ED 01100013	299.76	233	70.15	190	253.718	234.35	3.02	35.72	19.6	15.58	87	33.47	6.89	13.28	229	159	81.1004
DM	ED 01100017	157.82	43.82	77.41	120	32.5098	188.1	2.75	70.28	18.31	14.65	84	22.3	0.98	13.28	38	204	116.438
DM	ED 02100021	86.54	116.15	73.31	120	140.022	271.65	2.75	966.44	19.1	20.99	84.5	19.21	5.06	14.87	38	301	105.847
DM	ED 01100022	190.65	81.99	65.29	110	9.23732	214.7	2.75	51.34	21.01	15.76	87	15.51	0.98	15.54	267	567
DM	ED 01100024	201.58	39.59	76.38	130	87.1025	207.2	3.02	22.7	19.05	17.25	74	45.67	0.98	15.67	38	204
DM	ED 03100037	267.07	22.72	77.76	135	147.296	164.6	3.28	17.88	20.53	17.62	76	49.76	0.98	14.27	64.4	301
DM	ED 01100038	763.54	419.38	49.58	205	214.594	193.1	9.64	98.5	29.7	20.8	159	102.64	5.06	21.21	526.1	6641
DM	ED 05100084	645.72	383.45	54.31	260		218.1	4.87	75	23.36	44.66	125	95.17	18.84	15.67	89.6	228
DM	ED 04100085	1681.04	290.09	59.68	100	108.421	247.6	3.55	56.1	21.14	19.11	118	42.22	2.07	16.76	38	1243
NDM	ED 01100018	141.39	26.94	72.14	130	75.938	107.25	3.55	86.76	18.83	14.65	77	77.75	3.44	12.75	64.4	457	138.761
NDM	ED 01100019	364.99	144.07	61.06	120	157.848	223.15	4.87	117.24	20.89	16.13	104	19.83	2.73	18.27	267	2003	133.04
NDM	ED 03100023	348.7	58.63	72.81	130	163.236	178.15	2.62	32.3	22.15	19.11	87	22.91	2.07	16.55	38	987	85.8468
NDM	ED 01100039	167.19	146.22	61.52	180	72.9831	233.5	3.81	161.52	25.29	23.25	116.5	72.94	6.89	21.21	64.4	403	90.6959
NDM	ED 02100048	124.95	39.59	74.5	110	2.89694	311.4	2.49	37.08	24.7	18.36	90	27.87	2.07	28.07	38	204	100.697
NDM	ED 01100061	484.15	215.54	65.77	110	149.924	213.05	2.75	22.7	22.15	20.24	106	14.9	0.98	22.49	38	403	111.094
NDM	ED 04100070	386.7	211.18	58.77	130	81.4133	242.25	3.02	29.9	25.22	21.18	117	37.84	2.07	17.99	267	1049	85.8468
NDM	ED 03300075	343.27	381.21	52.57	130	200.196	256.65	3.02	46.6	20.41	16.5	93.5	11.83	3.44	19.1	273	682	111.094
NDM	ED 01100077	332.4	33.26	79.5	110	198.233	78.45	2.22	107.88	17.52	12.44	74	16.75	3.44	9.16	38	987	76.4582
NDM	ED 01100078	179.71	60.75	76.03	95	65.3376	204.7	2.22	13.02	18.01	12.81	67	17.36	0.98	11.71	267	76	100.697
NDM	ED 06100090	343.27	22.72	80.2	120	548.148	218.3	3.02	98.5	17.76	12.44	85.5	14.29	2.07	9.91	64.4	76	81.1004
NDM	ED 01100096	256.17	39.59	74.67	120	101.632	204.7	3.02	65.56	19.21	17.25	40	31.29	0.98	11.97	64.4	76	76.4582
NDM	ED 01100098	343.27	39.59	75.35	140	75.2489	218.3	3.28	107.88	18.94	15.39	63	18.59	3.44	12.62	161.1	252	85.8468
NDM	ED 02100099	124.95	86.25	69.99	110	289.671	196.4	2.49	17.88	18.31	13.18	62	13.36	0.98	9.91	38	116	121.878
NDM	ED 03300112	37.08	14.31	79.5	120	148.606	193.9	3.02	75	17.43	15.39	73	25.7	2.07	10.17	38	987	76.4582
NDM	ED 05100113	81.05	35.37	77.76	120	66.0888	190.6	3.55	41.84	18.78	16.5	87	163.81	2.07	14.6	38	76	81.1004
NDM	ED 01100114	223.43	22.72	77.76	100	82.0432	184.8	3.81	121.9	22.68	17.25	83	11.83	2.07	16.76	38	181	111.094
NDM	ED 02100120	196.11	43.82	73.15	100	74.9745	258.5	2.49	13.02	18.21	17.99	84.5	16.75	2.07	17.03	137.7	159	71.9214
NDM	ED 06200122	343.27	217.72	54.75	140	173.248	291.4	3.15	46.6	19.77	17.25	100.5	12.44	5.95	17.44	161.1	351	76.4582
NDM	ED 02100123	408.39	14.31	79.85	170	86.0439	101.05	3.02	70.28	17.91	13.54	71	19.52	0.98	9.35	89.6	116	85.8468
NDM	ED 06100129	234.35	48.04	63.08	150	163.08	230	2.75	98.5	19.54	24.58	102	21.06	6.89	15.4	359	801	81.1004
NDM	ED 01100130	168.77	48.04	69.33	100	219.515	196.4	3.02	32.3	18.89	14.28	74	12.44	0.98	13.21	38	276	71.9214
NDM	ED 01100157	81.05	31.15	79.15	90	37.4633	218.1	2.22	13.02	17.43	12.44	64	8.16	0.98	13.8	267	76	2092.11
NDM	ED 01100162	146.87	22.72	73.31	100	99.3428	287.35	2.22	22.7	18.73	13.54	53	9.99	2.07	15.27	38	76	144.573
NDM	ED 04100171	194.96	37.48	65.77	110	270.296	198.05	2.75	13.02	23.5	27.82	79	19.83	0.98	17.72	267	252	85.8468
NDM	ED 02100175	113.98	26.94	76.2	90	254.351	258.5	2.22	8.14	18.41	13.91	85	8.16	0.98	16.21	267	76	90.6959
NDM	ED 02100210	59.08	14.31	78.8	100	43.0667	213.05	2.75	17.88	18.21	13.91	64	75.83	0.98	12.62	267	987	168.724
NDM	ED 05100186	141.39	31.15	76.89	110	137.03	190.6	2.75	34.68	19.16	14.28	98	63.69	0.98	13.41	267	116	150.477
NDM	ED 02100188	332.4	209	66.41	110	75.0202	244	2.22	22.7	19.83	16.5	109	16.13	0.98	14.27	64.4	137	85.8468
NDM	ED 01100200	245.26	43.82	74.33	110	75.0202	219.75	3.02	17.88	23.36	17.62	84	73.26	0.98	15.4	89.6	247

## Sheet: preART Laboratorial Parameters
Diabetes Status	ID	WBC (μL)	NEUTROPHIL COUNT (%)	LYMPHOCYTE COUNT (%)	MONOCYTES (%)	HEMOGLOBIN (g/dl)	RBC (mill/cmm)	HEMATOCRIT (%)	PLATELETS (µL)	PG FASTING	PG 120MINS	FB GLUCOSE	NATURE SERUM	TRIGLYCERIDES (mg / dl)	T CHOLESTEROL (mg / dl)	HDL CHOLESTEROL (mg / dl)	LDL CHOLESTEROL (mg / dl)	VLDL CHOLESTEROL (mg / dl)	PLASMA UREA (mg / dl)	PLASMA CREATININE (mg / dl)	TBILIRUBIN (mg / dl)	TPROTEIN (gm / dl)	SALBUMIN (gm / dl)	SGLOBULINS (gm / dl)	SGOT (IU / L)	SGPT (IU / L)	A PHOSPHATASE (IU / L)	VITAMIND (ng / dl)	HbA1C RESULT (%)
DM	ED 01100064	14700	70	20	9	11.9	4.3	36	552	0	0	132	1	99	113	35	60	18	16.0	0.9	0.8	8.3	4.6	3.7	13	16	202	18	11.3
DM	ED 05100065	12600	80	18	2	10.5	4.1	33	445	0	0	49	1	120	127	22	74	31	24.0	0.8	0.4	8.2	3.9	4.3	12	05	162	07	7.7
DM	ED 04200066	11100	68	19	11	13.8	5.3	41	564	0	0	152	1	178	189	28	106	55	15.0	0.9	0.7	8.8	4.4	8.8	18	40	499	25	10.0
DM	ED 03300067	10900	75	13	12	12.1	5.5	36	239	0	0	243	1	155	254	35	143	76	18	0.9	1.0	9.3	4.2	5.1	18	14	396	13	11.4
DM	ED 05100068	7400	73	17	8	12.0	4.4	35	311	0	0	294	1	110	161	31	89	41	15.0	0.8	0.9	7.4	3.8	3.6	23	28	277	11	11.2
DM	ED 06200076	12100	81	09	9	13.8	5.0	42	471	0	0	272	1	151	183	36	97	50	14	0.7	0.4	7.8	4.1	3.7	10	07	419	4.1	14.6
DM	ED 01100079	8400	64	20	14	14	4.6	41	317	0	0	153	1	100	137	34	66	37	7	0.5	1	6.5	2.4	4	15	14	494	3	7.9
DM	ED 06100118	11600	69	20	9	12.6	5.0	38	455	0	0	211	1	112	191	44	115	32	15	0.8	0.5	8.2	4.1	4.1	6	8	199	14	11.3
DM	ED 01100119	9100	65	20	13	12.8	4.7	39	337	0	0	98	1	33	96	37	53	6	17	0.9	1.0	7.7	3.5	4.2	21	14	215	5	13.1
DM	ED 04100121	8700	57	27	9	11.5	4.3	36	380	0	0	126	1	104	246	42	165	39	15	0.9	0.4	9.2	4.4	4.8	12	10	270	26	10.2
DM	ED 04100124	14800	74	15	8	11.4	4.6	36	381	0	0	74	1	93	176	37	107	32	19	0.9	0.6	9.2	4.2	5.0	15	8	202	12	9.8
DM	ED 01100125	11700	71	20	6	11.6	4.8	38	328	0	0	157	1	99	132	31	78	23	16	0.8	0.9	7.6	4.1	3.5	25	21	251	10	8.3
DM	ED 06100126	10000	79	18	2	16.5	5.7	49	201	0	0	62	1	178	210	36	127	47	23	0.9	1.4	8.8	3.8	5.0	42	30	292	17	7.3
DM	ED 05100127	6500	61	18	10	16.4	4.8	47	180	0	0	377	1	167	221	83	106	32	28	1.8	1.2	8.6	3.9	4.7	36	12	371	8	11.9
DM	ED 04100132	8600	66	17	13	16.3	5.4	48	282	0	0	199	1	95	155	38	93	24	28	0.9	0.8	7.9	4.6	3.3	10	11	285	28	10.2
DM	ED 01100135	6700	57	24	16	13	5.2	40	359	0	0	132	1	86	198	43	125	30	19	1.0	0.8	8.1	3.9	4.2	13	11	420	15	11.2
DM	ED 05100137	12400	65	25	6	12.1	4.8	38	270	0	0	147	1	100	161	52	90	19	16	0.7	0.4	7.9	3.9	4.0	9	8	246	37	12.9
DM	ED 05100139	10300	75	18	6	11.8	4.5	37	510	0	0	349	1	111	164	43	93	28	17	0.7	0.5	8.4	3.9	4.5	13	14	196	7	14.7
DM	ED 05100140	10900	66	16	7	11.2	4.8	36	443	0	0	206	1	137	163	39	95	29	13	1.1	0.6	7.9	4.2	3.7	20	13	173	8	6.9
DM	ED 01100144	10500	81	9	9	15.6	5.2	46	364	0	0	225	1	128	194	34	123	37	15	0.9	0.9	8.5	3.7	4.8	13	6	296	24	12.2
DM	ED 01100145	14600	82	9	8	14.6	5.2	43	217	0	0	255	1	123	179	40	110	29	29	0.8	1.8	7.7	4.3	3.4	12	13	225	21	12.8
DM	ED 06100147	9600	70	21	6	10.6	3.9	33	403	0	0	397	1	113	279	50	187	42	19	0.8	0.4	7.6	4.0	3.6	10	9	464	21	13.6
DM	ED 06200150	8100	57	27	11	15.2	6.2	50	439	0	0	268	1	148	211	34	127	50	17	0.9	0.6	9.1	4.3	4.8	12	17	186	10	9.6
DM	ED 01100159	10600	52	38	5	13.1	4.8	38	229	0	0	254	1	88	143	49	72	22	16	0.9	0.5	8.3	4.4	3.9	15	17	246	16	12.2
DM	ED 01100046	12400	79	11	9	11.4	3.7	34	452	125	259	118	1	76	110	23	62	25	24.0	1.0	0.7	6.3	3.1	3.2	19	09	214	41	6.8
DM	ED 01100049	8000	73	18	7	12.5	4.7	38	365	122	326	114	1	99	218	57	112	49	30.0	1.0	0.5	9.1	4.1	5.0	20	06	288	26	6.2
DM	ED 03200054	12300	70	17	11	9.4	4.0	30	567	127	204	126	1	134	182	36	95	51	11.0	0.6	0.4	9.3	4.3	5.0	13	17	319	15	6.7
DM	ED 04100074	9100	63	19	9	11.4	4.1	36	484	98	232	86	1	100	135	26	70	39	9.0	0.7	0.3	7.4	3.1	4.3	13	06	335	17.9	6.2
DM	ED 03300111	8800	72	15	10	13.8	4.8	41	366	98	212	91	1	77	159	38	87	34	11	0.7	0.5	8.8	4.1	4.7	26	22	218	7	6.1
DM	ED 06200146	10300	56	26	8	15.6	5.6	45	288	273	535	311	1	166	208	35	128	45	21	0.9	0.5	8.9	4.7	4.2	10	13	358	26	11.8
DM	ED 04200154	9700	83	6	10	11.8	4.5	35	432	278	550	305	1	88	116	35	60	21	12	0.7	0.6	7.3	3.4	3.9	10	6	266	18	13.9
DM	ED 03300161	7100	79	12	8	16	5.1	44	236	112	306	141	1	109	140	39	76	25	11	0.8	0.7	8.8	3.7	5.1	16	10	233	14	7.3
DM	ED 01100003	8700	66	15	17	13.8	5	40	295	104	218	114	1	121	214	27	135	52	8	0.7	0.9	7.9	4.3	3.6	21	8	310	19.6	10
DM	ED 01100013	12700	69	16	12	12.6	4.9	38	302	220	475	236	1	96	165	33	92	40	12	0.6	0.4	7.7	3.6	4.1	17	06	357	32.2	11
DM	ED 01100017	10100	66	20	9	14.08	4.8	45	243	118	309	117	1	105	157	41	77	39	09	0.7	0.4	8.3	4	4.3	19	12	217	20.85	8.3
DM	ED 02100021	7100	65	25	8	13.4	5.1	41	327	104	203	96	1	66	202	38	118	46	18	1.0	0.5	8.4	4.5	3.9	19	57	256	29.64	6
DM	ED 01100022	9800	75	14	10	12.2	4.7	36	220	136	428	206	1	128	182	28	88	66	15	0.8	1.0	7.6	3.8	3.8	11	06	178	9.3	9.3
DM	ED 01100024	6700	60	30	7	16.7	6	49	318	150	312	146	1	102	168	32	101	35	22	1	0.6	7.9	3.9	4	15	31	351	48.33	8.5
DM	ED 01100035	12800	82	09	8	11.7	3.7	34	392	67	255	99	1	74	158	31	92	35	13.0	0.8	0.8	8.0	3.3	4.7	31	26	214	10	6.7
DM	ED 03100037	6300	71	16	10	11.3	4.7	36	281	293	448	281	1	147	294	57	162	75	22.0	0.7	0.3	7.4	3.7	3.7	18	21	336	07	11.8
DM	ED 01100038	9400	64	22	11	14.9	5.4	47	215	114	225	107	1	121	235	38	131	66	10.0	1.0	0.5	8.0	4.6	3.4	15	19	326	13	6.0
DM	ED 05100084	9600	79	17	3	8.8	3.6	28	687	97	320	113	1	66	95	28	45	22	12	0.7	0.3	7.2	2.6	4.6	19	16	401	6.0	6.8
DM	ED 04100085	11500	85	07	7	11.3	4.5	35	317	111	249	100	1	61	164	37	85	42	16	0.9	0.8	8.6	3.9	4.7	123	141	702	20	6.2
DM	ED 02100088	7800	69	15	12	13.0	4.2	38	366	145	202	272	1	60	124	25	68	31	26	0.7	0.7	7.7	3.4	4.3	22	19	246	9.0	9.1
NDM	ED 01100018	10000	64	18	12	11.4	3.5	35	676	88	113	89	1	44	123	33	66	24	09	0.7	0.3	7.5	3.6	3.9	10	13	246	15.9	5.6
NDM	ED 01100019	6200	54	32	8	11.9	4.9	37	329	93	96	103	1	67	152	69	59	24	18	0.7	0.3	8.9	4	4.9	16	09	230	27.75	5.4
NDM	ED 03100023	6700	61	23	8	10	4.3	34	351	85	123	95	1	70	193	54	97	42	18	0.7	0.3	8.1	3.6	4.5	29	18	178	5.9	5.4
NDM	ED 01100039	6800	60	18	17	10.9	3.0	33	131	101	127	83	1	113	160	19	93	48	12.0	0.8	0.7	7.8	3.3	4.5	12	09	183	17	5.1
NDM	ED 02100048	9700	75	15	9	14.9	4.7	43	562	90	94	98	1	100	177	51	83	43	20.0	0.9	0.5	8.1	4.3	3.8	21	13	159	27.3	5.7
NDM	ED 03300055	7300	64	21	11	12.6	4.0	37	249	92	119	81	1	111	162	27	89	46	8.0	0.6	0.6	8.7	3.5	5.2	18	10	249	41	5.2
NDM	ED 01100061	7400	70	18	8	9.0	4.0	28	378	90	112	101	1	67	165	44	85	36	11	0.7	0.4	7.8	4.0	3.8	21	22	497	16	5.7
NDM	ED 04100070	6700	66	18	14	12.3	4.5	41	262	91	94	91	1	69	155	31	83	41	22.0	1.0	0.4	8.9	4.1	4.8	17	12	245	13	5.3
NDM	ED 03300075	6200	55	29	11	13.8	4.8	43	295	96	98	82	1	79	112	32	52	28	20	1.1	0.6	8.0	4.8	3.2	15	08	231	14.5	5.4
NDM	ED 01100077	8300	44	37	8	16.9	5.5	51	296	86	137	101	1	74	182	38	98	46	14	0.9	0.3	9.7	4.6	5.1	32	26	343	8.8	5.6
NDM	ED 01100078	7700	53	33	9	15.0	5.9	46	307	93	76	91	1	94	146	35	69	42	15.0	1.2	0.3	7.9	4.3	3.6	13	08	178	15.3	5.4
NDM	ED 03100082	10400	70	23	6	12.0	4.3	39	494	97	129	98	1	91	173	37	92	44	14	0.8	0.2	8.3	3.4	4.9	21	19	483	13	5.6
NDM	ED 01100020	9200	76	14	8	13.2	4.2	40	284	84	120	94	1	90	166	52	84	30	19	0.8	0.6	8	4.3	3.7	17	14	213	49	5
NDM	ED 06100090	12200	62	25	9	11.8	4.8	39	557	87	123	101	1	60	150	38	76	36	21	0.8	0.5	8.2	3.7	4.5	24	37	235	17.8	6.6
NDM	ED 01100096	8600	61	16	14	14.2	5.0	43	562	78	106	85	1	76	142	27	77	38	20	0.9	0.6	8.9	3.6	5.3	17	15	219	12.9	5.9
NDM	ED 01100098	9100	64	20	13	12.7	5.6	41	454	87	120	95	1	88	162	35	88	39	13	0.9	0.1	8.4	4.0	4.4	17	10	231	16.5	5.6
NDM	ED 02100099	5200	67	17	10	12.9	4.5	41	260	84	94	90	1	72	177	52	83	42	14	1.0	0.5	7.4	4.1	3.3	20	20	187	26	5.0
NDM	ED 03300112	7200	63	27	7	14.9	4.8	45	318	101	106	98	1	83	170	35	95	40	18	0.9	0.4	7.8	4.6	3.2	12	7	181	23	5.7
NDM	ED 05100113	13100	64	20	7	13.7	5.0	42	752	89	122	92	1	96	153	34	84	35	24	0.9	0.3	9.7	4.4	5.3	16	8	277	29	5.7
NDM	ED 01100114	10200	73	21	1	12.5	5.1	39	444	96	119	99	1	39	146	48	71	27	18	0.8	0.7	8.4	4.2	4.2	23	12	326	16	5.8
NDM	ED 02100120	10200	68	20	9	14.0	4.6	44	485	96	119	97	1	105	178	55	97	26	11	1.0	0.2	9.3	5.1	4.2	22	19	276	30	5.5
NDM	ED 06200122	18700	78	11	10	9.9	3.8	31	645	81	131	76	1	58	86	22	49	15	16	0.7	0.3	8.1	3.1	5.0	27	14	294	9	5.6
NDM	ED 02100123	7600	63	27	7	11.6	4.5	37	480	99	129	99	1	94	177	37	107	33	9	0.7	0.3	8.5	4.1	4.4	11	8	223	11	5.8
NDM	ED 06100129	10100	71	19	8	7.7	3.7	25	645	85	108	79	1	67	124	24	79	21	16	1.0	0.2	7.1	3.1	4.0	10	5	171	3	6.5
NDM	ED 01100130	8100	74	13	12	15	4.8	45	383	68	130	112	1	90	163	42	93	28	29	0.9	0.5	7.1	4.1	3.0	23	14	203	20	6.1
NDM	ED 01100219	9300	67	22	6	12.3	4.2	37	576	85	73	91	1	67	186	37	115	34	20	0.7	0.5	7.3	4.2	3.1	11	9	216	23	6.2
NDM	ED 01100149	8900	53	19	8	11.9	4.4	36	357	87	109	79	1	51	168	53	89	26	11	0.8	0.3	8.3	3.9	4.4	16	8	189	15	5.8
NDM	ED 01100034	7700	74	15	8	13.6	5.0	40	365	82	131	86	1	72	128	32	66	30	13.0	1.0	0.5	9.1	4.2	4.9	17	43	624	32	5.4
NDM	ED 01100157	14500	63	17	13	12.5	4.4	39	372	86	101	93	1	88	125	30	71	24	21	0.9	0.6	8.3	3.7	4.6	18	10	221	23	6.1
NDM	ED 03200071	10600	70	14	11	11.0	3.9	33	275	78	123	78	1	49	92	22	49	21	25.0	0.9	0.7	8.3	3.4	4.9	48	23	261	14	5.8
NDM	ED 01100162	6500	62	19	16	11.2	4.3	34	145	86	102	88	1	91	151	29	89	33	12	0.9	0.3	8.1	3.4	4.7	21	18	162	27	6.1
NDM	ED 04100169	10000	71	15	13	10	4.4	30	454	105	136	109	1	142	139	19	92	28	13	0.7	0.8	7.8	3.7	4.1	119	66	451	11	5.5
NDM	ED 01100231	10400	78	10	10	13.3	5.1	39	510	98	122	92	1	96	172	51	92	29	11	0.9	0.4	8.2	4.1	4.1	29	23	318	11	6.4
NDM	ED 04100171	9500	66	22	10	12.3	4.4	39	423	74	137	81	1	63	153	36	89	28	13	0.7	0.2	7.7	4.0	3.7	35	23	216	24	5.1
NDM	ED 02100175	8600	69	13	7	11.7	3.7	34	340	101	110	92	1	49	140	38	84	18	20	0.7	0.4	7.8	3.7	4.1	12	10	145	33	5.3
NDM	ED 02100210	10600	79	13	7	13.6	4.3	39	445	85	81	85	1	73	142	23	86	33	27	0.8	0.9	7.5	3.8	3.7	17	11	129	37	5.1
NDM	ED 01100237	13700	90	4	5	8.7	2.4	24	706	98	125	92	1	78	122	30	69	23	10	0.7	0.5	6.2	3.2	3.0	26	28	336	13	6.8
NDM	ED 05100186	9800	69	19	6	13.8	4.8	41	475	89	129	85	1	80	136	33	79	24	10	0.9	0.7	8.8	4.3	4.5	19	7	185	30	5.9
NDM	ED 02100188	11900	79	10	10	14.4	4.8	41	436	112	132	97	1	65	129	38	71	20	20	0.8	0.7	8.3	4.2	4.1	16	9	140	21	5.8
NDM	ED 01100242	8200	73	19	5	10.9	4.5	34	344	87	68	93	1	79	171	46	95	30	13	0.8	0.3	8.2	4.2	4.0	11	9	169	14	5.7
NDM	ED 01100243	10500	55	25	5	13.5	4.6	39	346	86	77	90	1	58	119	31	67	21	26	1.1	0.4	7.8	4.9	2.9	22	20	261	27	5.3
NDM	ED 01100200	11700	81	11	6	13.3	5.4	41	608	86	89	96	1	121	135	34	72	29	16	0.9	0.5	7.8	3.9	3.9	22	27	598	7	5.2
NDM	ED 03300246	10800	37	20	4	11.2		35	358	72	120	83	1	75	129	32	56	41	25	1.3	0.3	8.7	3.8	4.9	16	8	390	31	5.5
NDM	ED 01100212	11200	67	21	7	12.9	4.6	40	516	86	90	84	1	93	150	41	33	109	21	0.9	0.5	7.8	3.7	4.1	14	12	218	15	6.1

## Sheet: HbA1C
Diabetes Status	ID	HbA1c 6th Month	Diabetes Status	ID	HbA1c 18th Month
NDM	ED 01100018	5.4	NDM	ED 01100018	5.1
NDM	ED 01100019	5.7	NDM	ED 01100019	5.1
NDM	ED 03100023	5.6	NDM	ED 03100023	5.2
NDM	ED 01100039	4.7	NDM	ED 01100039	4.6
NDM	ED 02100048	5.1	NDM	ED 02100048	5.6
NDM	ED 03300055	4.6	NDM	ED 01100061	5.4
NDM	ED 01100061	5.2	NDM	ED 04100070	5.2
NDM	ED 04100070	5.2	NDM	ED 03300075	5.0
NDM	ED 03300075	5.2	NDM	ED 01100077	5.8
NDM	ED 01100077	5.5	NDM	ED 01100078	5.3
NDM	ED 01100078	5.4	NDM	ED 06100090	6.3
NDM	ED 03100082	5.9	NDM	ED 01100096	5.4
NDM	ED 01100020	5.0	NDM	ED 01100098	5.3
NDM	ED 06100090	6.1	NDM	ED 02100099	5.3
NDM	ED 01100096	5.2	NDM	ED 03300112	5.3
NDM	ED 01100098	5.0	NDM	ED 05100113	5.9
NDM	ED 02100099	4.9	NDM	ED 01100114	5.2
NDM	ED 03300112	5.5	NDM	ED 02100120	5.8
NDM	ED 05100113	0	NDM	ED 06200122	3.8
NDM	ED 01100114	5.3	NDM	ED 02100123	5.6
NDM	ED 02100120	5.5	NDM	ED 06100129	5.3
NDM	ED 06200122	4.9	NDM	ED 01100130	5.7
NDM	ED 02100123	5.4	NDM	ED 01100157	5.8
NDM	ED 06100129	5.6	NDM	ED 01100162	5.6
NDM	ED 01100130	5.6	NDM	ED 04100171	5.4
NDM	ED 01100219	5.8	NDM	ED 02100175	5.3
NDM	ED 01100149	5.1	NDM	ED 02100210	4.8
NDM	ED 01100034	5.4	NDM	ED 05100186	5.3
NDM	ED 01100157	6.0	NDM	ED 02100188	5.6
NDM	ED 03200071	5.4	NDM	ED 01100200	4.8
NDM	ED 01100162	5.6	DM	ED 01100064	10.0
NDM	ED 04100169	5.0	DM	ED 05100065	9.0
NDM	ED 01100231	5.6	DM	ED 04200066	6.1
NDM	ED 04100171	5.3	DM	ED 05100068	11.6
NDM	ED 02100175	5.4	DM	ED 06200076	12.6
NDM	ED 02100210	5.0	DM	ED 01100079	14.9
NDM	ED 01100237	5.6	DM	ED 06100118	10.9
NDM	ED 05100186	5.9	DM	ED 01100119	10.6
NDM	ED 02100188	5.5	DM	ED 04100121	8.4
NDM	ED 01100242	5.5	DM	ED 04100124	8.5
NDM	ED 01100243	5.4	DM	ED 06100126	9.2
NDM	ED 01100200	4.5	DM	ED 04100132	7.3
NDM	ED 03300246	5.0	DM	ED 01100135	9.3
NDM	ED 01100212	5.8	DM	ED 05100137	14.5
DM	ED 01100064	9.1	DM	ED 05100139	10.2
DM	ED 05100065	10.7	DM	ED 05100140	8.2
DM	ED 04200066	12.5	DM	ED 01100144	10.1
DM	ED 03300067	15.0	DM	ED 01100145	6.4
DM	ED 05100068	13.0	DM	ED 01100159	9.9
DM	ED 06200076	13.5	DM	ED 01100046	6.3
DM	ED 01100079	17.7	DM	ED 01100049	5.5
DM	ED 06100118	7.7	DM	ED 03300111	5.7
DM	ED 01100119	11.0	DM	ED 06200146	12.5
DM	ED 04100121	10.3	DM	ED 04200154	7.6
DM	ED 04100124	12.1	DM	ED 03300161	8.2
DM	ED 01100125	6.9	DM	ED 01100003	5.9
DM	ED 06100126	7.1	DM	ED 01100013	11.8
DM	ED 05100127	11.1	DM	ED 01100017	11.3
DM	ED 04100132	6.6	DM	ED 02100021	5.3
DM	ED 01100135	5.4	DM	ED 01100022	7.0
DM	ED 05100137	13.1	DM	ED 01100024	7.7
DM	ED 05100139	11.2	DM	ED 03100037	10.1
DM	ED 05100140	7.8	DM	ED 01100038	5.9
DM	ED 01100144	7.9	DM	ED 05100084	5.9
DM	ED 01100145	5.7	DM	ED 04100085	5.7
DM	ED 06100147	10.8
DM	ED 06200150	6.7
DM	ED 01100159	12.3
DM	ED 01100046	5.9
DM	ED 01100049	5.7
DM	ED 03200054	6.8
DM	ED 04100074	6.4
DM	ED 03300111	5.2
DM	ED 06200146	10.6
DM	ED 04200154	13.5
DM	ED 03300161	6.3
DM	ED 01100003	6.0
DM	ED 01100013	10.5
DM	ED 01100017	10.1
DM	ED 02100021	5.5
DM	ED 01100022	8.8
DM	ED 01100024	6.4
DM	ED 01100035	6.0
DM	ED 03100037	10.8
DM	ED 01100038	5.8
DM	ED 05100084	6.2
DM	ED 04100085	5.7
DM	ED 02100088	7.4
