# Supplementary material for: Persistent inflammation during anti-tuberculosis treatment with diabetes comorbidity
Source: eLife. 2019 Jul 4;8:e46477. doi: 10.7554/eLife.46477 (PMC6660216; doi:10.7554/eLife.46477)
Supplement: Source data 2. [file elife-46477-data2.xlsx]

## Sheet: Instructions
Brazilian Cohort
Study_no	IBIT_TBDM
PID	Unique I.D
Clinical_group	TB or TBDM
Age	Age in Years
Sex	Male or Female
BMI	Body Mass Index
Smoking	never, past or current
Alcohol	yes or no
Lung lesion	Bilateral or Unilateral
Cavitation	yes or No
AFB smear grade	Min = 0, 1,2, Max = 3
Culture grade	Min = 0, 1,2, Max = 3
HbA1c_%	Percent of hemoglobin A1c
Timepoint_month	Each Sheet represents a different timepoint in month
	Brazil pre-ATT
	Brazil M2
	Brazil M6
Luminex data:	Log2 pg/mL

## Sheet: Brazil Meta data
Study_no	PID	Clinical_group	Age	Sex	BMI	Smoking_history	Alcohol_use	HbA1c_%
IBIT_TBDM	A105000	TB	58	Female	22.6	current	yes	10.6
IBIT_TBDM	A105004	TB	30	Male	19.4	current	yes	8.2
IBIT_TBDM	A105014	TB	48	Male	17.5	current	yes	7.8
IBIT_TBDM	A105022	TB	45	Male	20.6	past	no	9.2
IBIT_TBDM	A105023	TB	29	Female	22.2	never	yes	7.7
IBIT_TBDM	A105028	TB	18	Male	21.9	past	no	7
IBIT_TBDM	A105034	TB	21	Male	18.2	past	no	8.1
IBIT_TBDM	A105037	TB	28	Female	18.6	never	yes	12.5
IBIT_TBDM	A105039	TB	34	Female	19.7	current	yes	8.6
IBIT_TBDM	A105041	TB	24	Female	20.6	never	no	8.4
IBIT_TBDM	A105049	TB	50	Male	25	past	yes	7.5
IBIT_TBDM	A105050	TB	46	Male	23.6	never	no	7.8
IBIT_TBDM	A105052	TB	35	Male	24.9	current	yes	7.1
IBIT_TBDM	A105061	TB	26	Male	18.3	never	no	8.8
IBIT_TBDM	A105062	TB	46	Male	19.4	past	yes	8.3
IBIT_TBDM	A105073	TB	51	Male	19.3	past	no	5.3
IBIT_TBDM	A105074	TB	32	Female	18.2	never	no	5.5
IBIT_TBDM	A105077	TB	68	Female	17.9	past	no	4.8
IBIT_TBDM	A105080	TB	52	Female	19.9	never	no	5
IBIT_TBDM	A105088	TB	32	Male	17.6	current	yes	5.3
IBIT_TBDM	A105091	TB	55	Male	18.9	never	no	5.1
IBIT_TBDM	A105096	TB	35	Female	18	past	yes	5.4
IBIT_TBDM	A105097	TB	59	Female	20.6	never	no	5
IBIT_TBDM	A105101	TB	46	Female	19.6	current	yes	5.3
IBIT_TBDM	A105104	TB	48	Female	20.7	past	no	5.1
IBIT_TBDM	A105107	TB	45	Female	18.6	current	yes	7.3
IBIT_TBDM	A105001	TBDM	47	Male	21	current	yes	8.4
IBIT_TBDM	A105003	TBDM	56	Female	26.2	current	yes	9.2
IBIT_TBDM	A105006	TBDM	72	Male	22.2	never	no	7.6
IBIT_TBDM	A105007	TBDM	46	Female	18.3	current	no	7.5
IBIT_TBDM	A105016	TBDM	62	Female	27.4	current	no	8.2
IBIT_TBDM	A105020	TBDM	55	Male	18.5	current	yes	7
IBIT_TBDM	A105027	TBDM	37	Female	18.3	past	no	9.6
IBIT_TBDM	A105036	TBDM	37	Male	25.3	never	no	9.3
IBIT_TBDM	A105040	TBDM	61	Female	30.4	current	yes	8.9
IBIT_TBDM	A105047	TBDM	53	Female	18.9	current	yes	5.3
IBIT_TBDM	A105048	TBDM	57	Male	22.4	never	no	5.5
IBIT_TBDM	A105055	TBDM	37	Female	25.4	past	yes	5.2
IBIT_TBDM	A105056	TBDM	45	Male	20.1	never	no	5.2
IBIT_TBDM	A105065	TBDM	35	Female	19.8	never	no	5.3
IBIT_TBDM	A105081	TBDM	25	Female	18.6	never	no	4.9
IBIT_TBDM	A105084	TBDM	36	Male	22.6	never	no	4.7
IBIT_TBDM	A105093	TBDM	21	Female	19.8	never	no	4.8
IBIT_TBDM	A105100	TBDM	63	Male	19.7	past	yes	5.6
IBIT_TBDM	A105120	TBDM	46	Male	26.8	never	no	5.5
IBIT_TBDM	A105124	TBDM	62	Female	20.4	current	yes	5.3
IBIT_TBDM	A105131	TBDM	18	Male	20.2	never	no	5
IBIT_TBDM	A105136	TBDM	43	Male	17.9	current	yes	5.4
IBIT_TBDM	A105137	TBDM	54	Male	18.6	never	no	5
IBIT_TBDM	A105139	TBDM	32	Female	20.6	never	no	5.4
IBIT_TBDM	A105143	TBDM	53	Male	18.7	current	yes	5.5
								4.8

## Sheet: Brazil pre-ATT
Luminex_ID	PID	Study_no	Clinical_group	Timepoint_month	IFN-g	TNF-a	IL-2	IL-17A	IL-17F	IL-6	IL-7	IL-8	IL-12p70	IL-1b	GMCSF	GCSF	IL-4	IL-5	IL-10	IL-13	TGF-b
BBA_TBDM_001	A105000	IBIT_TBDM	TBDM	0	5.71034	3.64639	3.37089	4.11261	5.94157	6.4629	3.56716	9.35506	3.48257	4.77819	4.09393	7.3948	1.95507	1.28954	6.8569	3.19104	5.68116
BBA_TBDM_002	A105004	IBIT_TBDM	TBDM	0	5.86488	6.25371	3.80717	4.56913	5.10198	7.10808	2.0505	6.71586	3.5678	4.70386	2.90443	8.68128	0.914682	1.65403	1.70013	3.42056	4.85482
BBA_TBDM_003	A105014	IBIT_TBDM	TBDM	0	4.84947	6.439	2.88452	5.12239	5.33359	6.41748	2.10755	8.29906	3.33977	4.67882	4.43637	9.05179	0.948787	1.63962	1.56997	3.84124	3.03045
BBA_TBDM_004	A105022	IBIT_TBDM	TBDM	0	4.37097	5.34588	3.76821	4.0464	6.26301	7.17523	1.68493	7.65028	3.49868	5.00371	2.36755	8.06356	0.975948	1.63962	1.58159	4.232	2.16323
BBA_TBDM_005	A105023	IBIT_TBDM	TBDM	0	5.85399	6.27623	2.99762	3.73026	5.74018	6.17555	2.04037	7.92675	3.59521	6.26398	2.88948	9.27832	0.948787	2.20021	0.774093	3.85407	3.50171
BBA_TBDM_006	A105028	IBIT_TBDM	TBDM	0	5.72679	3.7436	2.68942	4.5252	6.38386	6.66734	2.53976	7.35042	3.19121	5.8369	1.68138	3.09837	0.900464	1.70688	1.54593	4.2115	2.82602
BBA_TBDM_007	A105034	IBIT_TBDM	TBDM	0	6.29755	9.45589	2.81376	5.13947	6.13636	6.09579	3.81253	5.88755	3.37174	5.01528	5.13391	13.8817	0.705438	2.41333	1.55794	4.22663	4.56268
BBA_TBDM_008	A105037	IBIT_TBDM	TBDM	0	5.79348	6.39859	3.64339	4.06625	6.73823	5.5612	3.31865	3.19084	2.4614	4.74571	1.06297	9.70316	0.892362	1.75575	3.89402	3.32319	5.09468
BBA_TBDM_009	A105039	IBIT_TBDM	TBDM	0	4.80636	9.5702	2.88577	4.93076	4.74326	5.73822	2.39097	7.43591	2.89846	9.37277	4.72687	11.3699	0.90511	1.64588	1.6488	3.51018	3.8628
BBA_TBDM_010	A105041	IBIT_TBDM	TBDM	0	6.36641	6.9656	3.24953	4.8712	5.3477	5.34418	3.39357	5.82092	3.36177	4.9821	3.54821	10.5505	0.873572	1.63223	4.27459	3.67383	4.61876
BBA_TBDM_011	A105049	IBIT_TBDM	TBDM	0	6.4814	7.33451	3.37257	4.28825	7.01611	4.99895	3.18038	6.54225	3.41642	4.75154	4.5833	10.653	0.864358	1.9351	1.59561	3.73812	4.84199
BBA_TBDM_012	A105050	IBIT_TBDM	TBDM	0	5.71361	8.20225	3.31822	4.8174	7.7978	4.24723	3.46077	5.69076	3.4248	4.85658	3.72069	11.7774	0.767664	2.07924	1.97583	4.02264	4.4202
BBA_TBDM_013	A105052	IBIT_TBDM	TBDM	0	5.17814	6.16904	3.9365	3.70755	6.85273	7.20975	2.38835	6.39397	3.23902	6.05044	2.71159	9.25766	0.936412	1.25898	4.49368	3.54611	2.43869
BBA_TBDM_014	A105061	IBIT_TBDM	TBDM	0	5.21618	6.45352	2.66604	4.21216	7.33254	4.84547	2.56092	8.25779	3.42257	5.29104	2.5001	10.843	0.828911	1.66225	4.63767	3.92002	3.03527
BBA_TBDM_015	A105062	IBIT_TBDM	TBDM	0	6.09359	6.90811	3.75151	2.22965	6.86135	5.6386	2.64049	6.44309	3.45045	4.9001	3.0469	11.024	0.861428	2.10415	1.24076	3.95516	5.56988
BBA_TBDM_016	A105073	IBIT_TBDM	TBDM	0	4.84947	6.32186	3.39687	3.47915	5.16447	6.5114	2.3883	3.65111	3.42223	4.94471	2.77141	8.94896	0.960569	1.54166	3.1081	3.37018	3.61553
BBA_TBDM_017	A105074	IBIT_TBDM	TBDM	0	5.52912	6.71178	3.36454	3.96862	7.57477	4.57852	2.79954	6.78255	3.33224	5.06175	3.40123	10.3168	0.909924	1.75677	3.81266	3.43471	4.30788
BBA_TBDM_018	A105077	IBIT_TBDM	TBDM	0	4.97295	6.19991	3.55779	3.80716	6.80075	5.50568	2.35457	7.16138	3.51018	4.70717	1.76009	9.12534	0.948403	1.7105	2.59561	3.64746	5.24563
BBA_TBDM_019	A105080	IBIT_TBDM	TBDM	0	6.4864	7.44283	3.57165	4.33183	6.44168	6.21984	3.14827	6.56329	3.44507	4.8224	3.2978	10.7507	0.841926	1.96613	1.71806	4.28691	3.43148
BBA_TBDM_020	A105088	IBIT_TBDM	TBDM	0	5.22943	7.12624	3.51955	4.28342	4.41479	6.03026	2.55301	6.65162	3.4135	4.62609	3.47678	10.1674	0.948403	1.7105	1.5891	5.54816	1.788
BBA_TBDM_021	A105091	IBIT_TBDM	TBDM	0	5.95565	7.17833	3.58809	4.18829	6.51615	5.91176	2.77859	6.94694	3.46897	4.87141	1.09683	10.2878	0.86747	1.95944	1.45974	3.80521	5.82659
BBA_TBDM_022	A105096	IBIT_TBDM	TBDM	0	5.5526	6.22199	3.52596	3.75188	6.47653	7.36551	2.4592	6.53478	3.46598	4.8774	2.74587	10.1076	0.922629	1.78779	1.55026	3.39963	5.17338
BBA_TBDM_023	A105097	IBIT_TBDM	TBDM	0	6.25528	7.26377	3.20789	4.40181	7.30375	4.43076	2.96474	6.38967	3.43403	4.85222	1.32099	10.8479	0.878644	1.82049	1.64658	4.16028	3.97947
BBA_TBDM_024	A105101	IBIT_TBDM	TBDM	0	6.20183	7.61181	2.68647	4.60301	5.44843	5.33437	3.66448	6.23627	3.44507	4.52685	5.96288	10.3502	0.866769	1.65035	2.19175	3.89394	3.91494
BBA_TBDM_025	A105104	IBIT_TBDM	TBDM	0	5.66703	6.94564	3.40656	4.6761	6.51428	4.65625	2.89884	6.52537	3.44415	4.77423	3.12669	10.6714	0.859853	2.04892	3.65111	4.38908	5.34745
BBA_TBDM_026	A105107	IBIT_TBDM	TB	0	5.64874	5.77661	3.03558	3.16255	5.67332	5.02346	1.89567	10.8918	2.35117	5.19247	2.79551	4.57534	0.828469	1.43729	6.82942	3.05503	2.29826
BBA_TBDM_027	A105001	IBIT_TBDM	TB	0	4.86678	6.05535	2.69736	4.19211	3.52973	6.42222	1.85128	9.92287	2.60521	2.98753	2.34766	6.67652	0.833977	1.43776	5.45098	3.24673	2.81399
BBA_TBDM_028	A105003	IBIT_TBDM	TB	0	5.12884	7.0206	3.02531	4.05949	3.68624	4.1817	2.50987	8.10614	3.70614	2.61936	2.71224	9.38899	0.755783	1.87074	5.69562	3.13848	2.60946
BBA_TBDM_029	A105006	IBIT_TBDM	TB	0	4.59513	5.91179	2.86841	3.41087	4.42162	5.29413	1.63893	8.3256	2.5053	3.14624	3.22896	4.67565	0.805113	1.36287	7.63338	2.66917	2.14322
BBA_TBDM_030	A105007	IBIT_TBDM	TB	0	5.66759	6.33879	2.37888	4.4253	3.96167	5.97704	1.51405	5.98665	4.73221	4.10621	2.33503	6.31652	0.890419	1.15205	5.70167	4.66065	2.12371
BBA_TBDM_031	A105016	IBIT_TBDM	TB	0	5.1035	6.56218	2.59685	5.20457	3.84382	5.90629	2.21819	5.89356	4.12178	4.35425	1.77547	7.26873	0.783058	1.64757	6.0016	4.55625	2.33365
BBA_TBDM_032	A105020	IBIT_TBDM	TB	0	4.50893	6.73119	2.54548	5.92429	3.97638	4.10225	2.03811	8.21239	4.39371	1.51896	1.88536	6.39381	0.798913	1.78174	5.43676	4.35816	1.70451
BBA_TBDM_033	A105027	IBIT_TBDM	TB	0	5.03633	5.96612	3.40862	3.17218	4.95491	2.60814	2.83702	2.32365	5.83921	0.485784	2.45689	6.63322	0.770896	1.56331	7.39182	2.78265	2.59927
BBA_TBDM_034	A105036	IBIT_TBDM	TB	0	5.35368	6.22064	3.33842	3.30045	3.62761	7.43816	1.63801	6.67518	2.82668	2.48095	2.35124	3.79091	0.750869	1.42292	8.83092	1.79391	3.13782
BBA_TBDM_035	A105040	IBIT_TBDM	TB	0	4.62305	5.73818	2.96062	2.94977	6.44005	6.31741	1.90138	7.94134	2.73822	1.98726	2.07862	3.37334	0.795326	1.42581	7.15059	4.09118	1.16793
BBA_TBDM_036	A105047	IBIT_TBDM	TB	0	5.21918	6.29337	3.18048	3.58412	4.49997	6.79174	1.89394	5.96438	2.79381	3.24865	2.85503	3.03307	0.753232	1.77237	6.72477	3.27229	3.12408
BBA_TBDM_037	A105048	IBIT_TBDM	TB	0	4.58929	6.65357	2.57138	3.39351	4.99769	6.58934	1.83119	8.25446	3.33947	5.62309	1.54892	3.18056	0.819199	1.42168	5.20079	3.66765	2.57722
BBA_TBDM_038	A105055	IBIT_TBDM	TB	0	4.53827	6.26351	2.87005	5.86193	3.79948	4.9878	1.77054	5.40598	2.33065	6.44255	2.26872	5.03807	0.891501	1.42762	7.3967	2.6826	2.50698
BBA_TBDM_039	A105056	IBIT_TBDM	TB	0	4.63308	6.41957	2.75348	4.61314	6.41986	4.45587	2.0626	6.60144	2.30721	4.8665	2.30119	3.78779	0.878039	1.36177	8.16778	2.65129	3.46175
BBA_TBDM_040	A105065	IBIT_TBDM	TB	0	4.42156	6.84578	2.74384	3.23186	4.69703	6.63185	2.28571	9.14865	2.39211	2.90265	3.04607	4.62447	0.822013	1.36632	6.64795	7.36768	0.559307
BBA_TBDM_041	A105081	IBIT_TBDM	TB	0	3.71171	6.28219	2.83231	3.40986	6.58614	2.94538	2.68958	4.36178	1.81169	4.64699	2.87064	4.8758	0.819525	1.48767	7.21638	2.70905	2.83036
BBA_TBDM_042	A105084	IBIT_TBDM	TB	0	4.14983	6.00323	3.07134	3.59969	4.23364	6.54527	1.5731	7.97544	1.22966	1.10878	3.4554	6.29344	0.029169	6.66844	5.02957	1.17637	2.64792
BBA_TBDM_043	A105093	IBIT_TBDM	TB	0	5.48979	5.99718	2.37334	4.15032	4.11149	7.44254	1.74399	5.74066	2.36064	6.58749	2.62312	3.78779	0.891189	1.29441	7.43335	2.74712	2.34009
BBA_TBDM_044	A105100	IBIT_TBDM	TB	0	6.37317	6.01555	2.67943	3.14173	4.24033	6.64415	1.99397	7.03858	5.60627	1.51896	2.22433	3.51781	0.792357	1.55745	5.55461	2.80971	3.07921
BBA_TBDM_045	A105120	IBIT_TBDM	TB	0	5.73863	5.8639	2.87213	2.72128	7.70888	4.70682	1.68839	6.41375	4.68777	4.48075	2.80369	4.74529	1.07112	0.695977	11.0507	1.2582	2.36226
BBA_TBDM_046	A105124	IBIT_TBDM	TB	0	5.27699	4.92847	2.78903	2.26361	2.62843	3.47586	2.73758	10.5302	3.4431	2.45421	5.45317	2.1036	0.839106	1.72085	9.11463	1.73325	3.55805
BBA_TBDM_047	A105131	IBIT_TBDM	TB	0	4.05822	6.79595	2.60758	3.73791	5.28553	2.95084	1.30284	12.1554	1.70038	3.22242	2.78722	5.81367	0.81404	1.7772	6.09737	4.0177	3.21243
BBA_TBDM_048	A105136	IBIT_TBDM	TB	0	4.78281	6.93265	2.95778	4.11674	3.08123	7.03031	1.70601	3.64685	2.23614	5.08282	3.70837	4.60787	0.833397	1.33149	8.61215	1.86991	2.71916
BBA_TBDM_049	A105137	IBIT_TBDM	TB	0	5.63044	5.9728	3.32724	3.24232	4.19524	6.01518	2.26428	7.82958	2.32365	2.52645	2.18655	6.33977	0.819525	1.48966	7.16061	5.05755	1.56024
BBA_TBDM_050	A105139	IBIT_TBDM	TB	0	5.60951	7.61395	2.22923	4.5802	4.1788	5.2756	2.5908	6.10834	2.24978	9.28166	1.95769	7.37099	1.19999	3.58272	5.53572	5.18699	3.22373
BBA_TBDM_051	A105143	IBIT_TBDM	TB	0	5.12659	6.35099	3.11052	3.07068	7.81729	6.48888	2.6353	4.1122	3.06015	2.50858	4.02821	3.88941	0.767306	1.89274	6.67382	3.11426	3.64044

## Sheet: Brazil M2
Luminex_ID	PID	Study_no	Clinical_group	Timepoint_month	IFN-g	TNF-a	IL-2	IL-17A	IL-17F	IL-6	IL-7	IL-8	IL-12p70	IL-1b	GMCSF	GCSF	IL-4	IL-5	IL-10	IL-13	TGF-b
BBA_TBDM_001	A105000	IBIT_TBDM	TBDM	2	8.10488	7.07874	4.63815	5.88033	6.05369	3.4182	3.53983	5.14408	4.66673	5.15457	3.63372	4.94021	1.26204	2.14362	6.08133	4.89321	1.68858
BBA_TBDM_002	A105004	IBIT_TBDM	TBDM	2	6.08867	6.74916	4.30748	6.7655	6.68597	5.30936	0.242365	7.56123	4.52452	5.32652	1.9889	4.8914	-1.40571	2.14362	6.43573	4.13253	2.59376
BBA_TBDM_003	A105014	IBIT_TBDM	TBDM	2	5.55915	5.95062	4.46143	5.9254	6.96223	5.68243	3.25889	5.95505	4.51906	4.94935	1.92543	2.48534	1.42939	2.15876	6.53272	6.07222	3.13844
BBA_TBDM_004	A105022	IBIT_TBDM	TBDM	2	4.93872	5.67441	5.02727	4.97399	6.44803	6.14799	3.25889	6.96859	4.55216	5.03104	3.13434	1.95858	1.44507	2.15876	4.85279	3.96353	2.43847
BBA_TBDM_005	A105023	IBIT_TBDM	TBDM	2	5.85817	6.06496	3.74487	5.29349	6.83674	5.92696	3.31145	6.18341	4.52452	4.90601	3.62829	2.13113	1.42417	2.14362	6.38843	5.99573	5.23267
BBA_TBDM_006	A105028	IBIT_TBDM	TBDM	2	7.11685	7.55513	4.90029	7.01461	6.59538	5.48233	0.495424	6.11959	4.54659	5.95065	1.80255	4.60484	1.30519	2.20298	6.5255	4.13253	2.25612
BBA_TBDM_007	A105034	IBIT_TBDM	TBDM	2	6.61278	6.87929	4.97213	7.7023	5.78654	6.19106	2.69688	6.82445	4.53001	5.22234	2.00659	4.72925	1.38251	2.25937	6.45875	4.83611	3.73641
BBA_TBDM_008	A105037	IBIT_TBDM	TBDM	2	7.16523	6.56758	4.68966	5.51426	6.35967	3.59286	3.99398	6.1123	4.52452	5.40313	1.3914	2.31436	1.3981	2.25937	6.48884	4.13253	2.64663
BBA_TBDM_009	A105039	IBIT_TBDM	TBDM	2	5.94098	6.16779	4.96726	5.20774	6.72479	6.21384	0.150499	7.05154	4.50819	4.92066	3.63372	5.51049	-1.36594	2.20298	6.53989	4.20757	3.89694
BBA_TBDM_010	A105041	IBIT_TBDM	TBDM	2	6.08867	6.16779	4.91036	5.37254	6.94379	6.22029	3.61851	7.104	4.50819	4.89115	3.92543	4.8914	1.42417	2.21734	6.5255	4.20757	2.60989
BBA_TBDM_011	A105049	IBIT_TBDM	TBDM	2	7.48592	6.90345	4.80986	5.67685	6.7036	5.77623	4.04499	5.79169	4.53001	5.244	2.24835	4.8914	1.37732	2.37691	6.38843	4.27747	2.15466
BBA_TBDM_012	A105050	IBIT_TBDM	TBDM	2	4.93872	5.95062	4.79924	5.32053	6.72269	6.22029	3.36142	7.02449	4.50279	4.8608	4.6492	5.11505	1.43984	2.17369	6.54703	6.49368	2.89864
BBA_TBDM_013	A105052	IBIT_TBDM	TBDM	2	5.29573	5.95062	4.43562	5.46918	6.82695	5.91935	2.78664	6.21775	4.49207	5.03104	3.74056	4.66894	1.40852	2.15876	6.50362	4.13253	4.46833
BBA_TBDM_014	A105061	IBIT_TBDM	TBDM	2	6.57105	6.34681	5.01304	5.9106	6.93451	5.96454	3.36142	6.98082	4.50279	5.08219	1.13434	4.38416	0.333917	2.15876	6.42797	4.00847	5.49839
BBA_TBDM_015	A105062	IBIT_TBDM	TBDM	2	6.2175	7.44786	4.28635	6.62089	6.73529	4.891	3.94027	8.41236	5.55741	5.26524	2.18495	4.72925	1.37213	2.14362	6.45112	5.99573	4.53706
BBA_TBDM_016	A105073	IBIT_TBDM	TBDM	2	6.2175	6.34681	4.82304	5.67685	6.5497	6.15468	3.75966	6.96859	2.93086	5.00451	4.3914	5.03135	1.41895	2.24553	6.50362	4.27747	3.81448
BBA_TBDM_017	A105074	IBIT_TBDM	TBDM	2	6.08867	5.67441	4.59705	5.08083	6.67782	6.02303	3.75966	6.03643	2.33484	5.08219	3.30374	4.8914	1.3566	1.40571	6.44345	3.86721	3.43811
BBA_TBDM_018	A105077	IBIT_TBDM	TBDM	2	5.76797	5.95062	4.099	5.96856	5.87891	5.61986	3.14483	7.60619	3.0377	5.47465	3.63372	4.53645	1.41895	2.63214	5.48384	3.96353	2.00763
BBA_TBDM_019	A105080	IBIT_TBDM	TBDM	2	6.52751	7.05839	4.3626	6.26027	6.08803	5.07014	3.72617	7.42978	4.51906	5.23323	3.68854	4.8914	-2.9	2.99999	6.38441	4.56934	4.32941
BBA_TBDM_020	A105088	IBIT_TBDM	TBDM	2	5.29573	6.06496	4.38282	5.55741	5.97885	5.87296	4.09357	5.15515	4.49742	5.00451	2.51675	2.20291	1.42417	3.54702	6.48884	3.96353	3.42677
BBA_TBDM_021	A105091	IBIT_TBDM	TBDM	2	6.08867	6.26121	5.10381	5.32053	6.33865	6.22673	0.193291	7.14199	4.52179	5.00451	3.74056	4.53645	1.40331	0.87069	6.5255	4.27747	1.50443
BBA_TBDM_022	A105096	IBIT_TBDM	TBDM	2	6.33174	6.49914	4.92785	5.42201	6.09148	6.17461	3.75966	6.81688	4.52452	5.03104	3.06347	5.09476	1.41373	0.976667	6.46634	4.61891	4.34233
BBA_TBDM_023	A105097	IBIT_TBDM	TBDM	2	5.55915	5.502	4.15363	6.04972	7.02687	5.70854	3.14483	6.56151	4.49742	5.36551	2.98147	4.46314	1.41895	2.12829	6.49625	3.86721	1.01763
BBA_TBDM_024	A105101	IBIT_TBDM	TBDM	2	7.31826	7.1931	4.69529	5.89558	7.03052	5.32039	4.30674	6.34994	4.5746	5.30648	3.18495	5.51049	1.37732	2.40147	6.33935	4.61891	3.79376
BBA_TBDM_025	A105104	IBIT_TBDM	TBDM	2	7.33834	6.95014	4.76162	5.74931	4.52083	5.85721	4.09357	6.30121	4.88087	5.22234	1.3914	5.22905	1.34885	2.42552	5.75451	4.51726	4.03621
BBA_TBDM_026	A105107	IBIT_TBDM	TB	2	5.15101	4.72159	4.66968	4.65949	6.35046	4.20117	2.19596	4.49289	2.15805	4.52847	3.06275	5.1206	1.58	2.5899	0.0702857	5.96969	3.5184
BBA_TBDM_027	A105001	IBIT_TBDM	TB	2	6.95464	6.42366	4.49047	5.00797	5.8185	5.72094	0.495424	6.01265	3.67781	5.70646	2.59004	3.51175	0.6	0.463833	0.0702857	8.49221	4.26797
BBA_TBDM_028	A105003	IBIT_TBDM	TB	2	6.93773	5.37398	4.61232	5.01808	-0.0177385	5.88033	2.33585	6.17204	3.8372	5.56583	3.48209	3.18294	0.0966453	2.3267	4.55344	4.05152	5.24107
BBA_TBDM_029	A105006	IBIT_TBDM	TB	2	4.79361	4.97009	4.46845	4.27862	5.78512	5.2657	1.36959	7.89226	5.55741	4.56285	1.12848	4.78621	-2.5	1.4648	5.14771	4.05152	3.39398
BBA_TBDM_030	A105007	IBIT_TBDM	TB	2	8.7814	6.28606	5.24866	4.56958	5.94333	5.10091	3.57994	5.39262	3.05778	7.25484	2.14987	4.8661	0.8	-0.106836	6.19739	5.75088	3.66478
BBA_TBDM_031	A105016	IBIT_TBDM	TB	2	6.40199	5.62125	4.59609	5.58903	4.82423	5.95152	2.70107	6.24323	3.90839	5.63075	2.41598	3.82515	0.167833	2.1073	4.81047	7.93161	3.77495
BBA_TBDM_032	A105020	IBIT_TBDM	TB	2	5.1836	5.00329	4.57739	4.41253	3.80639	5.08083	3.0377	7.89226	5.55741	4.82018	2.39719	2.84017	1.81686	1.40571	5.53158	4.05152	3.71774
BBA_TBDM_033	A105027	IBIT_TBDM	TB	2	5.15101	4.77971	3.9869	4.11732	5.85541	4.20117	0.150499	4.49289	2.15805	4.91205	1.19325	4.14696	1.52	0.218125	4.6147	5.94337	2.65628
BBA_TBDM_034	A105036	IBIT_TBDM	TB	2	5.63173	4.97009	4.31235	4.09969	5.73832	4.85456	3.0377	5.14627	2.81143	4.48074	1.21078	1.92875	1.3981	1.40571	5.14771	5.96969	3.97047
BBA_TBDM_035	A105040	IBIT_TBDM	TB	2	4.79361	5.03674	4.32951	4.32239	5.38863	4.49289	3.61851	4.7846	2.44976	4.6388	1.31211	4.84016	1.54	1.40571	6.00877	5.90068	2.3579
BBA_TBDM_036	A105047	IBIT_TBDM	TB	2	4.48683	5.00329	4.16513	4.11031	6.83284	4.71916	3.61851	5.01087	2.67603	4.60694	2.8981	1.7469	-1.06453	0.341186	5.47014	5.96969	3.82188
BBA_TBDM_037	A105048	IBIT_TBDM	TB	2	4.87753	6.23504	4.53428	5.41231	5.3784	6.1029	1.09006	6.39462	4.05978	5.47836	2.67783	3.48144	0.319221	1.10722	4.58373	4.24221	2.40723
BBA_TBDM_038	A105055	IBIT_TBDM	TB	2	5.1108	6.20914	4.71916	5.44398	6.25865	6.90778	3.0377	7.19949	4.86465	5.90161	1.68746	3.94011	1.12409	1.40571	6.00877	8.02649	3.70022
BBA_TBDM_039	A105056	IBIT_TBDM	TB	2	6.47678	5.69641	4.4989	4.79361	6.0014	5.66552	3.0377	5.95723	3.62239	5.74229	3.05853	3.01203	-0.118166	0.0686064	5.98287	7.63191	5.46044
BBA_TBDM_040	A105065	IBIT_TBDM	TB	2	4.72877	6.15657	4.57405	5.22548	5.57885	6.1029	1.56924	6.39462	4.05978	5.8202	2.82615	3.90322	0.319221	2.22236	5.47014	8.66392	3.41586
BBA_TBDM_041	A105081	IBIT_TBDM	TB	2	6.9293	5.66528	4.5458	5.07404	7.14615	6.1176	3.0377	6.40931	4.07447	5.45992	3.97605	3.19169	1.3981	2.14362	5.39498	7.72395	3.77935
BBA_TBDM_042	A105084	IBIT_TBDM	TB	2	5.9254	5.63389	4.16513	4.84607	5.75801	4.85456	1.98612	5.14627	2.81143	4.74772	1.19325	4.8661	-0.929127	2.14362	5.43901	4.5931	2.7067
BBA_TBDM_043	A105093	IBIT_TBDM	TB	2	6.13149	5.37398	4.31235	4.92	6.33571	5.08083	3.63906	5.37254	3.0377	6.28118	2.29	2.85242	-0.702857	2.23855	5.14771	5.47924	2.7053
BBA_TBDM_044	A105100	IBIT_TBDM	TB	2	6.57004	5.81818	4.37797	5.05064	3.6874	5.63075	2.46592	5.92246	3.58762	5.21369	2.22877	2.70036	-0.152936	2.14362	5.9303	3.68555	3.73802
BBA_TBDM_045	A105120	IBIT_TBDM	TB	2	4.74772	5.23957	3.9968	4.67977	5.86704	4.41774	0.883499	4.70945	2.37461	3.79003	2.04994	4.78621	1.43461	2.23152	7.25879	6.65532	2.98888
BBA_TBDM_046	A105124	IBIT_TBDM	TB	2	6.38952	5.62125	4.27862	4.94349	7.1691	5.69913	3.53983	5.99085	3.65601	5.84913	4.8064	2.84017	-0.0845497	2.28656	5.37596	5.60362	4.54006
BBA_TBDM_047	A105131	IBIT_TBDM	TB	2	4.59609	5.23957	3.85999	4.45601	3.75469	7.60054	1.39296	7.89226	4.52452	6.04972	3.48209	5.1206	1.81686	1.66589	6.03441	5.24572	2.20175
BBA_TBDM_048	A105136	IBIT_TBDM	TB	2	6.28118	5.03674	4.4844	4.52847	6.14847	4.97399	3.0377	5.2657	4.53001	5.15887	2.63747	2.67313	-0.809694	0.0686064	5.53158	5.79059	3.6936
BBA_TBDM_049	A105137	IBIT_TBDM	TB	2	5.1836	5.03674	4.41122	4.3914	5.40886	4.37797	1.7684	4.66968	4.50279	5.44115	1.21774	2.6301	1.3877	2.05789	4.74382	5.77931	3.49832
BBA_TBDM_050	A105139	IBIT_TBDM	TB	2	5.76578	5.27335	4.37119	4.26359	6.52856	5.08083	2.28176	5.37254	4.80908	5.29895	3.48209	2.96193	-0.6	2.1073	4.67837	5.72212	4.80681
BBA_TBDM_051	A105143	IBIT_TBDM	TB	2	6.60597	4.81	4.30074	4.43833	6.81461	5.08083	0.912771	7.89226	5.55741	4.00659	2.45394	5.1206	1.81686	1.4648	5.04708	4.00847	2.77003

## Sheet: Brazil M6
Luminex_ID	PID	Study_no	Clinical_group	Timepoint_month	IFN-g	TNF-a	IL-2	IL-17A	IL-17F	IL-6	IL-7	IL-8	IL-12p70	IL-1b	GMCSF	GCSF	IL-4	IL-5	IL-10	IL-13	TGF-b
BBA_TBDM_001	A105000	IBIT_TBDM	TBDM	6	8.41494	7.73627	4.77144	3.18096	6.07573	7.38677	5.37134	7.71059	3.7539	5.30162	5.75807	4.23275	0.704221	2.82106	7.8914	7.02283	4.23368
BBA_TBDM_002	A105004	IBIT_TBDM	TBDM	6	8.48867	7.14732	5.01316	3.34211	5.79919	6.54112	4.35135	6.5592	5.2874	8.14325	3.9015	3.41845	0.720956	2.34552	6.94738	6.07881	1.3137
BBA_TBDM_003	A105014	IBIT_TBDM	TBDM	6	6.47191	7.44353	4.66216	3.10811	6.81251	6.58673	4.65788	6.74134	5.49105	2.49747	2.91448	4.69161	-1.688	2.13619	7.92328	7.05471	1.11312
BBA_TBDM_004	A105022	IBIT_TBDM	TBDM	6	7.46802	7.56894	4.55042	3.03361	7.59356	6.79206	4.69902	9.81548	6.06027	4.5475	5.99913	2.77402	0.778617	5.02152	6.26033	5.39176	4.82578
BBA_TBDM_005	A105023	IBIT_TBDM	TBDM	6	7.24762	7.18841	4.9666	3.31107	6.28044	6.41568	5.22082	8.68136	5.55218	2.49747	2.80353	6.09423	1.5668	2.34552	6.7276	5.85903	3.59222
BBA_TBDM_006	A105028	IBIT_TBDM	TBDM	6	8.25302	8.63068	4.40167	2.93444	7.02224	7.28079	4.5713	7.31436	5.62464	3.89875	4.52478	5.54494	0.842848	3.30696	7.57336	6.70478	3.74182
BBA_TBDM_007	A105034	IBIT_TBDM	TBDM	6	7.84856	7.92943	5.08407	3.38938	7.65164	6.4514	4.65788	6.45738	5.02152	2.49747	4.59075	2.85232	0.826953	3.47429	7.85891	6.99033	5.33849
BBA_TBDM_008	A105037	IBIT_TBDM	TBDM	6	8.41494	7.62724	4.90343	3.26895	5.79919	6.8323	5.0187	7.41897	4.5582	9.16352	5.8901	5.72739	0.951226	3.35093	7.61188	6.74331	3.74182
BBA_TBDM_009	A105039	IBIT_TBDM	TBDM	6	7.34048	8.05698	4.48681	2.99121	5.65443	6.98194	4.37778	7.18157	4.26198	6.28001	4.38142	5.75541	0.770466	2.13619	7.69536	6.82679	4.82309
BBA_TBDM_010	A105041	IBIT_TBDM	TBDM	6	8.01589	7.88386	4.2683	2.84553	6.21021	6.92188	4.8149	7.10817	5.08807	6.13248	5.46733	5.29261	0.778617	3.00476	7.87929	7.01071	4.30771
BBA_TBDM_011	A105049	IBIT_TBDM	TBDM	6	7.34048	7.50781	4.41324	2.94216	5.70416	6.52257	4.29325	6.82354	5.34149	4.5475	6.10424	3.79611	0.770466	2.52484	7.73998	6.87141	5.54024
BBA_TBDM_012	A105050	IBIT_TBDM	TBDM	6	8.50644	6.968	4.45014	2.96676	6.09382	7.64923	4.11534	9.49169	6.05028	5.83386	3.39341	2.77402	0.81095	2.13619	6.15185	5.28328	3.21043
BBA_TBDM_013	A105052	IBIT_TBDM	TBDM	6	8.25302	7.73627	4.17572	2.78382	6.30949	6.75928	5.53508	7.82606	4.59075	5.56175	5.13056	5.46046	0.897657	2.82106	7.87523	7.00666	5.62448
BBA_TBDM_014	A105061	IBIT_TBDM	TBDM	6	7.90686	6.63924	4.96176	3.30784	6.30949	6.75928	4.14876	5.21006	4.34286	5.56175	3.16495	4.32178	-1.31551	2.34552	7.70438	6.83581	4.41106
BBA_TBDM_015	A105062	IBIT_TBDM	TBDM	6	8.5583	7.88386	4.29658	2.86439	6.24494	6.12548	4.95439	5.27896	5.32372	4.5475	4.12996	6.39602	0.947439	3.35093	7.80897	6.94039	5.05823
BBA_TBDM_016	A105073	IBIT_TBDM	TBDM	6	8.37638	5.80649	4.31538	2.87692	6.30949	6.50384	5.37134	6.45738	4.5582	5.77962	2.27459	5.51182	0.754077	3.51285	7.93116	7.06259	5.02879
BBA_TBDM_017	A105074	IBIT_TBDM	TBDM	6	8.11619	5.77066	4.94933	3.29955	5.94944	6.33177	4.52716	6.74134	3.7539	4.5475	5.9458	5.86171	0.913086	0.292243	7.48856	6.61999	3.30857
BBA_TBDM_018	A105077	IBIT_TBDM	TBDM	6	6.91885	5.52656	4.73239	3.15493	5.57078	7.05816	3.86822	8.17624	5.63864	4.5475	2.69759	4.23275	-1.42781	2.13619	7.70438	6.83581	4.68409
BBA_TBDM_019	A105080	IBIT_TBDM	TBDM	6	7.14732	7.22819	4.28481	2.85654	7.6337	6.58673	3.78703	6.28762	3.87333	5.56175	4.38142	2.75191	0.729279	2.13619	8.00803	7.13946	5.2372
BBA_TBDM_020	A105088	IBIT_TBDM	TBDM	6	6.55836	8.24435	4.80587	3.20392	7.07702	6.77983	4.98695	7.20058	4.99853	3.86728	5.13056	5.40694	0.920764	3.63916	7.81739	6.94882	2.92638
BBA_TBDM_021	A105091	IBIT_TBDM	TBDM	6	8.37638	6.63924	4.86128	3.24085	5.73011	7.00767	3.89082	7.49227	5.35902	5.77962	5.30569	4.69161	-1.6407	3.16495	7.62137	6.7528	4.8817
BBA_TBDM_022	A105096	IBIT_TBDM	TBDM	6	8.06704	5.75554	4.89083	3.26055	6.13488	6.38752	4.61534	7.34131	4.90209	3.89875	4.5582	4.48293	0.786743	3.06047	7.84242	6.97385	3.79991
BBA_TBDM_023	A105097	IBIT_TBDM	TBDM	6	8.01589	8.20905	5.66371	3.77581	5.79919	7.21253	4.34697	7.42618	3.87333	7.97629	4.12996	2.85232	-1.6407	2.43839	7.88737	7.0188	3.29708
BBA_TBDM_024	A105101	IBIT_TBDM	TBDM	6	8.25302	8.13532	4.94933	3.29955	5.57078	7.51066	4.88659	7.46829	5.24999	4.5475	5.45932	5.29261	-1.59513	2.52484	7.668	6.79943	3.64697
BBA_TBDM_025	A105104	IBIT_TBDM	TBDM	6	6.85458	7.22819	4.94517	3.29678	5.79919	6.93328	4.92095	7.00865	4.62247	5.30162	5.15127	5.86171	0.858637	2.82106	7.72228	6.85371	2.92965
BBA_TBDM_026	A105107	IBIT_TBDM	TB	6	9.18725	7.64365	4.00821	2.67214	6.39607	6.82522	4.79761	6.82522	4.18006	6.47191	4.87678	3.88862	0.185983	2.81602	5.66618	8.38885	4.33421
BBA_TBDM_027	A105001	IBIT_TBDM	TB	6	8.11715	7.19365	3.85613	2.57075	6.24494	6.34386	4.11126	6.34386	4.0566	6.20121	1.35007	3.3604	-0.29538	0.0411413	4.97983	9.53951	5.31329
BBA_TBDM_028	A105003	IBIT_TBDM	TB	6	6.24488	6.99045	3.98758	2.65839	6.42263	6.71225	3.69621	6.71225	4.19314	5.8671	4.73551	3.85671	0.0730158	0.170827	4.56478	9.32239	5.90684
BBA_TBDM_029	A105006	IBIT_TBDM	TB	6	6.96679	4.16655	3.87902	2.58601	6.59024	4.95124	4.31113	4.95124	1.27357	5.58167	3.93032	2.92602	0.786743	0.406444	5.1797	4.62247	4.10275
BBA_TBDM_030	A105007	IBIT_TBDM	TB	6	9.29804	7.64365	5.06628	3.37752	7.05351	8.48149	4.75042	8.48149	5.0109	7.83898	3.76569	3.74699	1.84225	2.04481	5.61899	10.1116	3.83986
BBA_TBDM_031	A105016	IBIT_TBDM	TB	6	6.54154	7.78742	4.27858	2.85239	6.58409	5.52199	5.09239	5.52199	3.71836	5.39335	4.48736	2.73083	-1.11725	2.12087	5.96096	5.1095	7.72389
BBA_TBDM_032	A105020	IBIT_TBDM	TB	6	6.90752	6.19229	4.87165	3.24777	6.30949	4.99853	4.97274	4.99853	2.26746	5.08807	1.20355	4.75415	0.786743	2.75043	5.84131	10.1895	4.01433
BBA_TBDM_033	A105027	IBIT_TBDM	TB	6	8.47028	7.22741	3.92358	2.61572	6.00339	6.8781	4.11126	6.8781	4.4762	6.5483	4.35256	4.00923	0.238863	0.0868571	4.97983	10.979	7.14372
BBA_TBDM_034	A105036	IBIT_TBDM	TB	6	7.57416	6.97041	3.37659	3.25106	6.24494	5.74535	3.79094	5.74535	3.37961	5.81981	3.0466	3.61839	-0.893887	0.406444	4.65951	7.82446	3.66969
BBA_TBDM_035	A105040	IBIT_TBDM	TB	6	6.8768	6.26362	3.14474	2.09649	6.36842	5.69313	5.27257	5.69313	1.90949	6.18331	-0.626656	4.87065	-0.946106	2.47734	6.14114	5.06628	1.89582
BBA_TBDM_036	A105047	IBIT_TBDM	TB	6	8.05546	6.99045	3.2141	2.14273	6.44819	6.22759	5.43499	6.22759	3.19278	7.59259	2.17849	3.40754	-0.411643	0.292243	6.30356	8.0509	4.89253
BBA_TBDM_037	A105048	IBIT_TBDM	TB	6	6.42634	4.64113	4.11126	2.74084	6.09382	5.0441	3.49756	5.0441	3.9831	5.98864	4.99853	2.73083	0.794839	0.713605	4.36613	4.92691	4.5549
BBA_TBDM_038	A105055	IBIT_TBDM	TB	6	5.97807	4.87933	3.93447	3.62298	6.62394	4.74191	3.19467	4.74191	4.4762	5.63864	1.41326	2.07072	-1.89733	1.70717	4.06324	5.41017	3.53989
BBA_TBDM_039	A105056	IBIT_TBDM	TB	6	6.78264	5.24619	4.06324	2.70883	5.47727	5.32372	3.13451	5.32372	2.89513	6.36742	1.37703	4.97731	0.81095	1.88473	4.00308	5.69313	6.45591
BBA_TBDM_040	A105065	IBIT_TBDM	TB	6	6.78264	7.83657	3.49756	2.33171	5.57078	5.21143	3.60082	5.21143	4.6623	6.1374	3.62352	3.19271	0.81095	1.84065	4.46939	4.62247	4.95124
BBA_TBDM_041	A105081	IBIT_TBDM	TB	6	6.12566	7.78742	6.8677	4.57847	6.05203	4.49045	5.33973	4.49045	3.83201	5.45932	-0.103019	1.92582	-2.14879	0.120012	6.2083	7.30416	4.34403
BBA_TBDM_042	A105084	IBIT_TBDM	TB	6	8.05546	6.6517	3.81504	2.54336	5.61371	5.99913	5.99913	5.99913	3.19278	6.54154	1.06952	3.83223	-0.640107	1.61292	0.0868571	6.15597	4.3055
BBA_TBDM_043	A105093	IBIT_TBDM	TB	6	6.96679	6.26362	3.65621	2.43747	6.71437	5.79548	4.21518	5.79548	3.25795	6.48615	3.64174	5.16696	-0.843757	0.406444	5.08375	5.15127	1.40147
BBA_TBDM_044	A105100	IBIT_TBDM	TB	6	6.45024	7.61867	4.13921	2.75947	6.49977	6.91885	2.83418	6.91885	6.57028	7.39307	0.263846	3.75578	0.279618	-0.0981313	3.70275	8.9555	4.53322
BBA_TBDM_045	A105120	IBIT_TBDM	TB	6	6.78264	7.78742	6.8677	4.57847	6.09875	4.99853	3.13451	4.99853	3.64353	5.02152	3.12235	3.09061	0.794839	1.70717	4.00308	7.30416	3.81802
BBA_TBDM_046	A105124	IBIT_TBDM	TB	6	8.55423	7.08655	3.66969	3.44646	6.26218	7.40332	5.1676	7.40332	4.4048	6.39056	2.03558	4.13413	0.764087	1.32809	6.03617	7.40672	4.28966
BBA_TBDM_047	A105131	IBIT_TBDM	TB	6	5.87	6.77451	3.31588	2.21059	5.24886	6.68838	2.65185	6.68838	4.4048	6.55502	3.265	3.98758	0.0491468	0.514286	3.52042	6.12802	3.81802
BBA_TBDM_048	A105136	IBIT_TBDM	TB	6	8.47028	7.61867	3.73496	2.48998	6.47282	6.58808	5.74022	6.58808	4.22534	6.28707	-0.512025	3.98758	-0.0511534	0.514286	6.60879	11.2313	4.18178
BBA_TBDM_049	A105137	IBIT_TBDM	TB	6	8.44532	6.82035	4.40026	2.93351	6.30949	6.89864	3.06047	6.89864	4.22534	7.19244	4.93913	4.12717	0.259406	1.4232	3.92904	7.32608	4.33815
BBA_TBDM_050	A105139	IBIT_TBDM	TB	6	9.17074	7.29268	3.96661	2.6444	6.91761	7.49521	5.86129	7.49521	4.24432	6.71225	4.77007	4.14747	0.855978	2.84794	6.72986	8.2582	5.2568
BBA_TBDM_051	A105143	IBIT_TBDM	TB	6	6.17199	6.8781	3.93447	2.62298	6.24494	4.34286	3.19467	4.34286	2.8091	6.50721	2.17044	4.97731	-2.29638	-0.248676	4.06324	4.62247	4.68361
