# Supplementary material for: Persistent inflammation during anti-tuberculosis treatment with diabetes comorbidity
Source: eLife journal article supplement (doi:10.7554/elife.46477), 2019-07-04
Supplement: supp [file elife-46477-supp-v1.zip]

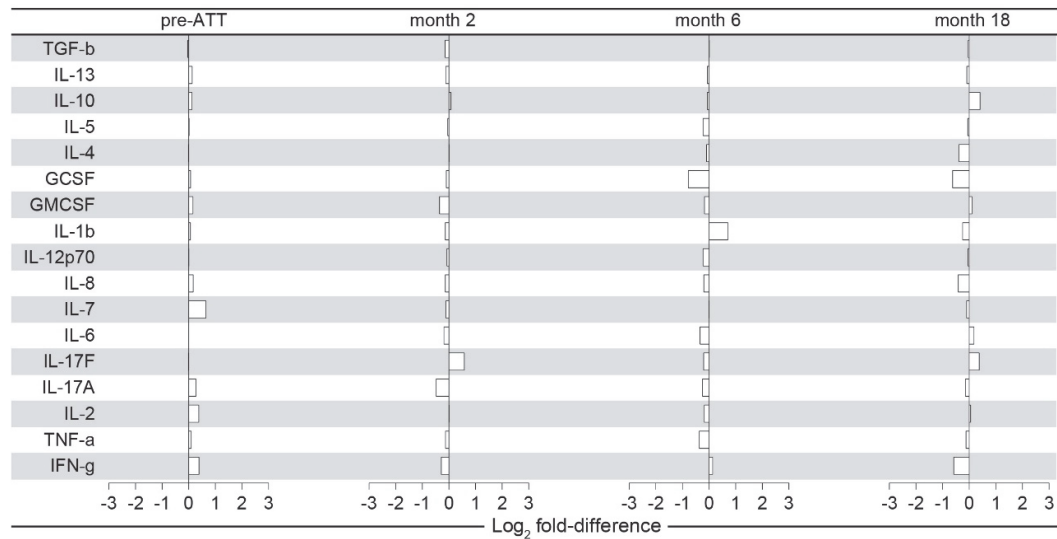

**Figure 3 – figure supplement 1. Biomarker profiles in India cohort TBDM participants with KDM vs NDM at enrollment.** Mean fold-differences at each timepoint are compared between participants with known DM diagnosis prior to enrollment (KDM) vs those newly diagnosed with DM at enrollment (NDM). Comparisons were analyzed using the Mann-Whitney *U* test and adjusted for multiple comparisons. There were no statistically significant differences between the two groups.
